# Supplementary material for: Identification of promoter activity in gene-less cassettes from Vibrionaceae superintegrons
Source: PubMed Central journal article supplement (PMC11014356; doi:10.1093/nar/gkad1252), 2024-01-12
Supplement: gkad1252_supplemental_file.pdf [file gkad1252_supplemental_file.pdf]

**Supplementary Table S1.** Fragments sequences cloned in pDProm

| Name                                    | Origin species               | Sequence (5' → 3')                                                                                                                                                                                                                                                                                                                                                                                                                                                                                                                                                                                                                                                                                                                                                                                                                     |
|-----------------------------------------|------------------------------|----------------------------------------------------------------------------------------------------------------------------------------------------------------------------------------------------------------------------------------------------------------------------------------------------------------------------------------------------------------------------------------------------------------------------------------------------------------------------------------------------------------------------------------------------------------------------------------------------------------------------------------------------------------------------------------------------------------------------------------------------------------------------------------------------------------------------------------|
| <i>mCherry</i>                          | -                            | GCAGTGAGCGCAACGCAATTTACTTGTACAGCTCGTCCATGCCGCCGGTGGAGTGGCGGCCCTCGGGCGC<br>GTTTCGTAAGTGTCCACGATGGTGTAGTCCCTCGTTGTGGGAGGTGATGTCCAACCTTGATGTTGACGTTGTAG<br>GCGCCGGGCAGCTGCACGGGCTTCTTGGCCTTGTAGGTGGTCTTGACCTCAGCGTCGTAGTGGCCGCCGT<br>CCTTCAGCTTCAGCCTCTGCTTGTATCTCGCCCTTCAGGGCGCCGTCCTCGGGGTACATCCGCTCGGAGGAG<br>GCCTCCCAGCCCATGGTCTTCTTCTGCATTACGGGGCCGTCGGAGGGGAAGTTGGTGCCGCGCAGCTTCA<br>CCTTGTAGATGAACTCGCCGTCTTGCAGGGAGGAGTCTGGGTACGGTCACCACGCCGCCGTCTCGAA<br>GTTTCATCAGCGCTCCCACTTGAAGCCCTCGGGGAAGGACAGCTTCAAGTAGTCGGGGATGTCGGCGGG<br>GTGCTTACAGTAGGCCTTGGAGCCGTACATGAACTGAGGGGACAGGATGTCCCAGGCGAAGGGCAGGGG<br>GCCACCCTTGGTCACCTTCAGCTTGGCGGTCTGGGTGCCCTCGTAGGGGGCGGCCCTCGCCCTCGCCCTCG<br>ATCTCGAACTCGTGGCCGTTACGGAGCCCTCCATGTGCACCTTGAAGCGCATGAACTCCTTGATGATGG<br>CCATGTTATCCTCCTCGCCCTTGCTCACCATGGCTTGCTCCTTAGGAGCAAGCCATGAGTAAAGG |
| $P_{lac}$ <i>attC</i><br><i>gfp</i>     | -                            | CTCACCATGGCTTGCTCCTTAATGTGAGTTAGTCACTCATTAGGCACCCCAGGCTTTACACTTTATGCTT<br>CCGGCTCGTATGTTGTGTGGAATTGTGAGCGGATAACAATTTACACAGGAAACAGCTATGAGTTAACAA<br>ACGCCTCAAGAGGGACTGTCAACGCGTGGCGTTTCCAGTCCCATTGAGCCGCGGTGGTTACGGTTGGTGT<br>GTTTGTAGTTTTGTGTTATGCGTTGTACGCCCTTAGGCGGGCGTTAGCCAGGAGCAAGCCATGAGTAAAG<br>G                                                                                                                                                                                                                                                                                                                                                                                                                                                                                                                               |
| $P_{lac}$ <i>attC</i><br><i>mCherry</i> | -                            | CTCACCATGGCTTGCTCCTTGGCTAACGCCCGCCTAAGGGGCTGACAACGCATAACACAAAACCTCAAACA<br>CACCAACCGTAACCACCGCGGCTCAATGGGACTGGAACGCCACGCGTTGACAGTCCCTCTTGAGGCGTT<br>TGTTAACTCATAGCTGTTTCCCTGTGTGAAATTGTTATCCGCTCACAAATCCACACAACATACGAGCCGGAA<br>GCATAAAGTGTAAGCCTGGGGTGCCTAATGAGTGAGCTAACTCACATTAGGAGCAAGCCATGAGTAAAG<br>GG                                                                                                                                                                                                                                                                                                                                                                                                                                                                                                                            |
| C1                                      | <i>V. cholerae</i><br>N16961 | CTCACCATGGCTTGCTCCTTTTGTGTTGCCAACGAGAAAAAAGTACCTAAAGCAGAATACTTAGGGCTAAT<br>GTCCGTGTGTTTTTGGCTAGGTTTTCGTATTTCAATTTCTAGTTATTAGGTGTTGTGAAAATTGTTCTTTGG<br>TTCTTGCAGGATTTGGGCTTTCTGTTTCAGAGGCTGTTAGCTTGTGAAAGCCTGCTCTGCTGCATTGTC<br>GTTCCAAAAGGTTTTGTTGGTGTTCAAAAGTCCGTTTTCTACGGCGTTGTAATTTCAAAGTGGTTTTAGTGA<br>CAGGCGCTTTGAAACTGCGCCTGATTTGAGTTTCTTAATACACGTAAAGCTCGTGTGGCAAAGCGGCAA<br>TCCACTTCAAATGAAAGTGTAGGTCTGGCAACTAACAAAGCATTCAAGAGGGATTACAAACGCTTGGCA<br>GTTTTGGTTTTGAATCAGCTTTAGTGTACTGCACAATAGCTTAGGTTGGGTGGTGGCGTTGTTACCCCT<br>TAATGCGGCGTTATGTAGGAGCAAGCCATGAGTAAAGG                                                                                                                                                                                                                                                          |

|    |                              |                                                                                                                                                                                                                                                                                                                                                                                                                                                                                                                                                                                                                              |
|----|------------------------------|------------------------------------------------------------------------------------------------------------------------------------------------------------------------------------------------------------------------------------------------------------------------------------------------------------------------------------------------------------------------------------------------------------------------------------------------------------------------------------------------------------------------------------------------------------------------------------------------------------------------------|
| C2 | <i>V. cholerae</i><br>N16961 | CTCACCATGGCTTGCTCCTTTTATGCTTAATCCATAAAAATCAGCAGGTTGTAATTGTCGATTTCTTTGGC<br>ATTTTCATTCAGGTTTTGTCGGCAATTCAATATTGTTTTTCGCTGCCTAATGAAGCGGCAATGTATCTGGTG<br>CTGAAAATTCAGTGTTATTGCCTCATTGAGTTGTCGCGCCCATGCGTGGTGAGTGAGTTTTGTCGGAGAGG<br>TTTTCACATTGGCCTAGTTGCTAAATGAAAGCCTGCATTGGTCAGTTCATAAGTAAAAGTTGAGCCAGTT<br>CTAATTCAAGGAAATTCGATGTTTTGGTCAATAATTTTCAGTGAGTTACTCTTGAGTTGGCTCAAATGTAAA<br>GTGTTGAAGCTTAAGCATAACAAACGCCTCAAGAGGGACTGTCAACGCGTGGCGTTTTCCAGTCCCATTGA<br>GCCGCGGTGGTTGCAGTTGTTGTGTTTGTGTTTGTGTTTGTGTTTGTGTTTGTGTTTGTGTTTGTGTTTGT<br>TAGGAGCAAGCCATGAGTAAAGG                                                        |
| C3 | <i>V. cholerae</i><br>N16961 | CTCACCATGGCTTGCTCCTTTTATGTTTTCTCTCAGGAAAATCATCAAAAATTCACGCACAAGGTTCTGAAAA<br>TTCAGCCTTTATCGTTCAAGCTGCACAATTTGGTTTTGGGGTTTTTCCTGATGTTGATTTGGTAGAAAGCG<br>TTGAAAGTTCAGCGGTTTTCAAACCGCGGATAACCAACAAGCTTTGATGCTTCAATGTTGTCGGACGTTT<br>AACTTGATCAGTTTGGTTTCATAAAAGGTTGAATCATCGCTGTGATCTGGCTTTCTTTGTGCGGACTCTTA<br>ACGTTTTGGCAGCCAACCTTCACAGCTTTTTGGCGTTGGACGTGTGTTTTCGCTGATGCTTTTTGCGTAAAATGA<br>CTTTCAAGAAAATGAGTTTAAAAAGTCATTGTTAAACAATAGGCTACGAAACTAACAAACGCCTCAAAG<br>GGACTGCCAACGCGTGGCGTTTTCCAGTCCCATTGAGCCGCAGTGGTTTTCGGTTGTTGTGTTTGTGTTTGT<br>GTAATGCGTTGTCAGCCCCTTAGGCGGGCGTTATGTAGGAGCAAGCCATGAGTAAAGG                  |
| C4 | <i>V. cholerae</i><br>N16961 | CTCACCATGGCTTGCTCCTTTTATGCTTCTTGAAGCAAAAATTATCAAAGTCTGGATTTAATTGTCCTGAAA<br>ATTCAGCTTTTAGTGTTCAAGTTTACAATTTGGCTTTTCGAGTCTTTCTGATGCTTATTTGGTAGAAAGTGT<br>GGAATCTTCAGCAGTTTCAAAGCCGCTAAAAATCATCAAACCTTGATGCTTCAATGTTGTTGGATGCTCC<br>AAACGGAAAGCTTGGTTTCACAAAGGCTGCATCATCGCTGAAAGAGTGTTTTCTTTGTCACGGACTCTTA<br>ACGTGGCCAACTTAACCTTGAATGCTTTGAGTTTTGGCTGTTTACTTCACAGCTTTTTGGTGCTGGACGTGC<br>GTTTGTTCGATGCTTTTTCGCTAAAATTGCTTTCTCAAATCATTGTTAAACAATGGGCTACGAAGCTAACA<br>AACGCCTCAAGCGGGACTGTCAACGCGTGGCGTTTTCCAGTCCCATTGAGCCGCGGTGGTTTTCGATTGTTG<br>AGGTTGAGTTTAGTGTTAATGCGTTGCCAGCCCCTTAGGCGGGCGTTATGTAGGAGCAAGCCATGAGTAA<br>AGG |
| C5 | <i>V. cholerae</i><br>N16961 | CTCACCATGGCTTGCTCCTTTTATGCTTCTTAAAGCAAAAATCGGTTTAATTGTCCTAAAAATTCAGATTTT<br>AGCGTTCAAATTGCACAATTTGGCTTTTGTGCTTTTCTTGTGCTGATTTGGTTCGAACGTGTTGAAAGTTC<br>AGTGGGTGCAAAGTCGCTGAAAAGTAAAGCCTCGATGCTTCAACGTTGTTGGATGTTCCGCTCGGAAA<br>GTTTGTATTTACAAAATGCTGCATCATCGCTGTGATCTTGTCTTTCTTTGTCGCGGACTCTTAACCGTGGCC<br>AACTTAACCTTGATCGTTTTAAGTTTTGGTAGCCAACGTCACAGCTTTTTGGCGTTGGACGTGTGCTTGCTT<br>GATTTCTTTGCGTAAAATGCCTTTCAAACAAATGTGTTAAAAGCCATTGTTAAACAATAGGCTACGAAGC<br>TAACAAACGCCTCAAGAGGGACTGTCAACGCGTGGCGTTTTCCAGTCCCATTGAGCCGCGGTGGTTACGGT                                                                                     |

|    |                              |                                                                                                                                                                                                                                                                                                                                                                                                                                                                                                                                                                                                                                                                                                                                               |
|----|------------------------------|-----------------------------------------------------------------------------------------------------------------------------------------------------------------------------------------------------------------------------------------------------------------------------------------------------------------------------------------------------------------------------------------------------------------------------------------------------------------------------------------------------------------------------------------------------------------------------------------------------------------------------------------------------------------------------------------------------------------------------------------------|
|    |                              | TGTTGTGTTTGGGTTTAGTAGTAATGCGTTGCCAGCCCCTTAGGCGGGCGTTATGTAGGAGCAAGCCATG<br>AGTAAAGG                                                                                                                                                                                                                                                                                                                                                                                                                                                                                                                                                                                                                                                            |
| C6 | <i>V. cholerae</i><br>N16961 | CTCACCATGGCTTGCTCCTTTTAGCTTCTTAAAGGCTAAGATCATCAAAAATCCAACTTCTTGTTCTGAAA<br>GATCAGTTTTTAGTGTTCAAAGTGCACAATTTGGCATTTCATTTTTGCTAGATGCTGATTTGGTAGAAAAGT<br>GTTGGAAGTTCCGCAGTTTCAAAGCCGCTGAAAGCCAACAAGTCTCGATGCTTCAAAGTTGTTGAATGTT<br>CAATTCGGTCAACTTGGTTTACAAAAAGCAACATCGTCGCTGAAATCGTGCTTCTTTGTCGGAAATGCA<br>GTAAGTGGCCAACCTTAGCCTTGAACGCTGCAAGTTTTGGCAGCTCACTTACAGCTTTTGGCGTTGGACG<br>TGTGTTTGAAGTATGCTTTTTCGTAATAATGCATTTCAAGCAAATGTGTTTAAAAAGTCATTGGTAAACAA<br>TGGGCTACGAAACTAACAAACGCCTCAAGAGGGACTGTCAACGCGTAGCGTTTCCAGTCCCAATGAGCC<br>GTAGTGGTTACGGTTGTTGTGTTTGAAGTTTGGTGGAAATGCGTTGCCAGCCCCTTAGGCGGGCGTTATGTA<br>GGAGCAAGCCATGAGTAAAGG                                                                                                     |
| C7 | <i>V. cholerae</i><br>N16961 | CTCACCATGGCTTGCTCCTTTTAGCTTAATCCATAAAAATCAGCAGGTTGTGAATGTCGATTCTTTGGG<br>ATTTTCGTTCAAGTTTTGTCGGCAATTCAATATTGTTTGTGCTGCCTAATGAAGCTGCAATGTGTCTGGCG<br>CTGTAATTTCTGAGTTGTTGCTTCACTAGGTTTTTGAAGTCTGCGCGAGGTTAGTCTTGTGGCTCAAGTCG<br>CTTTGAGCAGTCTGGTGCCTTTACTTACAGGCTTAAAGTCTGTGCGCAATTGAATATTGTTTTGCGCTGCC<br>TAATGAAACAGCAATGTGTCTGTGCTGTAAATTTCAAGTGTATTGCCTCATTGAGTTGTGCGGCCCATGC<br>GTGGCGAGTGAGTTTGTGCGAGAGGGTTTCCACATTGGCCTAGTTGCTAAATGAAAGCCTGCATTGGTCA<br>GTTTCATAGGTGAAATTTTAGCCAGTTCTAATTCAGGAAACTCGGAATTTGGCCAATGATTTTCATTGGGTT<br>ACTCTTGATTTGGTTCAAATGTAAAGTGTGAAGCTTAAGCATAACAAACGCCTCAAGAGGGACTGTCAA<br>CGCGTAGCGTTTCCAGTCCCATGAGCCGCGGTGGTTACGGTTGTTGTGTTTGAAGTTTGGTGTATGCGTT<br>GTCAGCCCCTTAGGCGGGCGTTATGTAGGAGCAAGCCATGAGTAAAGG |
| C8 | <i>V. cholerae</i><br>N16961 | CTCACCATGGCTTGCTCCTTTTAGCTTCTTAAAGCAAAAATCATCAAAAATCTGGGTTTAATTGTCCTAAAA<br>ATTCAGATTTTAGCGTTCAAATTGCACAATTTGGCTTTTGAAGCTTTTCTTGATGCTGATTTGGTCGAACGT<br>GTTGAAAGTTCAGTGGGTGCAAAGTCGCTGAAAAGTAAAGCCTCGATGCTTCAACGTTGTTGGATGTT<br>CCGCTCGGAAAGTTTGATTTACAAAAATGCTGCATCATCGCTGTGATCTTGCTTTCTTTGTCGCGGACTCT<br>TAACCGTGGCCAACCTAACCTTGATCGTTTTAAGTTTTGGTAGCCAACGTCACAGCTTTTGGCGTTGGACG<br>TGTGCTTGCTTGATTCTTTTTCGTAATAATGCCTTTCAAACAAATGTGTTAAAAGCCATTGTTAAACAATAG<br>GCTACGAAGCTAACAAACGCCTCAAGAGGGACTGTCAACGCGTGGCGTTTCCAGTCCCAATGAGCCGCG<br>GTGGTTACGGTTGTTGTGTTTGGGTTTAGTAGTAATGCGTTGCCAGCCCCTTAGGCGGGCGTTATGTAGGA<br>GCAAGCCATGAGTAAAGG                                                                                                      |
| C9 | <i>V. cholerae</i><br>N16961 | CTCACCATGGCTTGCTCCTTTTAGCTTCTTAAAGGCTAAAATCATCAAAAATCCAACTTCTTGTTCTGAAA<br>AATCAGCTTTTAGTATTCAAATTGCACAATTTGGCATTTCATTTTTCTAGATGCTGATTTGGTAGAAAAGT                                                                                                                                                                                                                                                                                                                                                                                                                                                                                                                                                                                            |

|     |                              |                                                                                                                                                                                                                                                                                                                                                                                                                                                                                                                                                                                                                                             |
|-----|------------------------------|---------------------------------------------------------------------------------------------------------------------------------------------------------------------------------------------------------------------------------------------------------------------------------------------------------------------------------------------------------------------------------------------------------------------------------------------------------------------------------------------------------------------------------------------------------------------------------------------------------------------------------------------|
|     |                              | GTTGGAAGTTCCGCAGTTTCAAAGCCGCTGAAAGCCAACAAGCCTCGATGCTTCAAAGTTGTTGGATGTT<br>CAACTCGGTCAACTTGGTTTTCAAAAAAGCAGCATTGTGCGCTGAAATCGCGCTTTCTTTGTCGGAAATTC<br>GGTAAGTGGCCAACCTAACCTTGATCGCTGCGAGTTTTGGCAGCTCACTTCACAGCTTTTGGCGTTAGAC<br>GTGTGTTTGAGTGATGCTTTTGCCTAAAATGCATTTCAAGCAAATGTGTTTAAAAAGTCATTTTTAAACAA<br>TGGGTTATGAAGCTAACAAACGCCTCAAGAGGGACTGTCAACGCGTGCCGTTTCCAGTCCCATTGAGCCG<br>CGGTGGTTTCGGTTGTTGTGTTTGGGTTTGGTTGTTATGCGTTGTCAGCCCCTTAGGCGGGCGTTATGTAG<br>GAGCAAGCCATGAGTAAAGG                                                                                                                                                         |
| C10 | <i>V. cholerae</i><br>N16961 | CTCACCATGGCTTGCTCCTTTTAGTTTTCTCTCAATCAAAAATCATCAAAATCTAAGCTCATTTGCATTAAA<br>CATGCAGCTTTTAGTATCCAAATTTCAAAAGTTGGCTTTTGGTTTTGCTTGATGCTGATTTGGCAGAAAG<br>CGTTGAAAACGCAGTAGTTTCAAAGTCGCCGCAAGCCAACAAGTCAAGATGCTTCAACGTTGTTGGGTGT<br>TCAGCGCGGTCAGCTTAGTCTCACAAGGAGCAGCATCATCGCTGTGATCTGGTTTTCTTTGTCGCGGACTA<br>TTAACAGTGGCCAACCTAACCTTGATCGTTTTAAGTTTTGGTAGCTTGCTTACAGCTTTTGGTGTGGAC<br>GTGTGCTTGTAAGATGCATTTGCGTAAAATGCTTTTCAAGTAAAGGTGTTAAAAACCATTGGTAAACAA<br>TGGGCTACGAAACTAACAAACGCCTCAAGAGGGACTGTCAACGCGTGCCGTTTCCAGTCCCATTGAGCC<br>GCGGTGGTTATGGTTGTTGTGTTTGGTTTTAGTTTTAGTGGTAGTGCCTGCCAGCCCCTTAGGCGGGCGTTATGTA<br>GGAGCAAGCCATGAGTAAAGG |
| F1  | <i>V. fischeri</i> ES114     | CTCACCATGGCTTGCTCCTTTTATACGAAATCAATGACGTCCAAATTATAAATATTTAATAGTAACCTACC<br>TGATTTTACAGTTAGTAAGGCAGTGTCAATGTAATAAAAATCGTAGTCACTCCTTACTTATGTGTTGCTGTA<br>GACAAGCATTTCATGTCTGGGACTCAATTTTAGCCAATGAGTCCCTTTTTTTTGTGCCGAGGGGGGTAGCG<br>TTAAAAACAAACCTGTCTTATTTTACAGTTGGTTAAGAGTGATTCCAGTAATAAACTGGAGCTCCTCATA<br>ATTTTTGTGCTGCTGTAGACAGGCATTTACGTTTCCAGGTTCCGATTCCAGTCATCGAGCCCTTTTTTTATTC<br>ATATCTCTTGTTGTTTGTAGCTGTGATAAGATGTAATTTATATTAAGTTTTGTATATATGCTTATTCAAAC<br>TAAAGTAGACACGTATAACAAATGCATCAACACGATTTGCTACATTCGGCATTCTAGATTTCTTTGGGTTT<br>GCCGCGTTAAGTGGTAAATTTAAGCTTAATCTGCATGGTAGCAAACGTGTTATGCAGGTGTTATGTAGGA<br>GCAAGCCATGAGTAAAGG |
| F2  | <i>V. fischeri</i> ES114     | CTCACCATGGCTTGCTCCTTTTATACGAACTCTGAGAATGCAGTTTTTTGGTTTCAGTTCAGCGATTGAACC<br>ATTAGTTTTTTAGGTGTGAAAGTAAGGTGGTTTTCCTTTTCTTTGTTGCCTTTTAGTGTTCGTTTCATCAG<br>GTTTCGGCATTGAACTATTATTGCCCAAATTCAGGCGTTTCAGAACTAATTTACGTTCAATTGTTTCATG<br>GTTTTGCCTCATTTTAGCCTGCATCAGTGTTCCTCGCAGCATTTTCAATCCCAATTGTGGTTAGGATATT<br>TGGTTTATTAGCTCAGAAGTTGATGAAACCAAATCGTACAAATAGTGTAAGAAAAAGGATTGTTTCGTT<br>TCACAATTATTGTTGTTGGTTGGATATTTGCTCGCTTAATTGAGCCAGTCTAATTAAACTCAGTTTACAG<br>CAAATCTTGGTAAATCAGTTCTTTACCAAGTTAATTGGAGCGAAAGCAAGGCTCGTATAACAAAGCAATC                                                                                                        |

|    |                                  |                                                                                                                                                                                                                                                                                                                                                                                                                                                                                                                                                                                                                                                                       |
|----|----------------------------------|-----------------------------------------------------------------------------------------------------------------------------------------------------------------------------------------------------------------------------------------------------------------------------------------------------------------------------------------------------------------------------------------------------------------------------------------------------------------------------------------------------------------------------------------------------------------------------------------------------------------------------------------------------------------------|
|    |                                  | AACACGATGCTATTTACATTTCGGCATTTCGCGGTTTGGAGTATAATTGGTTTTGTAAGTCAGTCTTTTCGCAC GTGTTATTGTGGCGTTATGTAGGAGCAAGCC <b>ATGAGTAAAGG</b>                                                                                                                                                                                                                                                                                                                                                                                                                                                                                                                                         |
| F3 | <i>V. fischeri</i> ES114         | <b>CTCACCAT</b> GGCTTGCTCCTTTTTGTGCGTACTAAGCCCGAAATTTTTTGCACGGTTCCTCAATAGAAACGAG ACTTTTTTTAAACGCTATTTAGCTATCACAAATCCTCTTCTTTGTTGCCTTTTAGCGTTCGTTTCATCAGGT TCGGCAATTAAGCATTGTTCGGTCTAAGTTCAGGCGTTTCAGAGGCATTTTTACGCTTCAATGGTCTTTGG TTTGTCATCATTTTACTCTGCATCCGTGTTTTCTCGCAGCATTTTCAATCCCAGTTGTGGCGAGGATATTT GTTTATCAGCTCAAATCTGCTGAAACCAAGTCGTTCAAATGGTGTAAAAAATGTATCTGTTTTCCATTT ACTTCATCTCGCAGTTTAAAGAACATTTTGTTCGCTTAATTAGCATCGTTAAATTAGAATCAGGGCTTAGAC AATTTTGGCGGGGAGTTCTTTACCAAGTTGTCCAAGCCGAAAGAGAGTCCGCACAACAATCGCATCAAC ACGATTTACTACTCGGCAATCTCAGTTTGCCGAGTGTCTCGTTTTAGGGCATCAATATTCAGTATAA TTGTATAGTAGTAAACGTGTTATGCAGGCGTTATGTAGGAGCAAGCC <b>ATGAGTAAAGG</b> |
| P1 | <i>V. parahaemolyticus</i> VPD14 | <b>CTCACCAT</b> GGCTTGCTCCTTTTAGGGACGGGCAGGAAAGTTCTTTGTTCTCATCTTCTTAGTTCTCTTTGA GCATTTCGTTTTCTAAGTCGGCAACTTGGTATTGTTCGGCTCAAATTTCTTGAATCTCTCCAGCCGTAACA TGCCAAATTTTCGCGGGTTCCTCATTTGGTTTTGAGTGTGGATGGTGGTGAGTTTGACTTGCTCAAAGTGT GGCAAGGGCAAGTCAATTGAGGCTTTTCGATTGCGCTGCTAGTTTGTTCGCGTTGGCATTTCGCGTTCAA ACCCGCGTTGTTGTTGAAGGTCGGCATCTCGTGGTCTGTTGGAATTTTGGCTGAAACATAGTGAGTTTGTG GTTCTTGAATCACAAATAATCAGTGTATGTTTGGTTGCTTATTTTGTTCGGGTAATCTGCTTTCAAACAA CCTTGAAACTGGTGTGAAACTTCGCCTAACAAGGCGTTCAAGACGGATTACAACGCTTGGCGCTCTCGG TTTTCTTTGAGTTAAGTGATTATGTCACAATGGTTTAGGTAGGGTGGTAGGCGTTGCTCACCCTAACGC GCGTTATGTAGGAGCAAGCC <b>ATGAGTAAAGG</b>                             |
| P2 | <i>V. parahaemolyticus</i> VPD14 | <b>CTCACCAT</b> GGCTTGCTCCTTTTAGTTGCCAACGAGGAAAACGTACCCAAAGCAGATTGTTTAGGGCTAAT GTCCGTGTGTTTTTTGGCTAGGTTTTTCGATTTTCAATTTCTAGTTATTTAGGTTTGTAATAATCGATCGTTGG TTTCTTGTGGTTGAATTTCTATTTTCAAGAAACCGATTTATATGTTGAAAGTTAGCTGTGTAACATTGTCT GTCCAAAGGAGCTTTTTGGTGTGTAGCCCGTTTTCTACGGCGTGTATGTACCAAGTGGTTTTAGTTAC AGTCGCTTTGAATCTGCGCCTGATTTGAGTTTTTCAACGTACGTAAAGTTAGCGTTGGCAAAGTGGCAATT AACTTCAAATCAAAGTGTAGACTTGGCAACTAACAAAGCATTTAAGAGGGATTACAACGCTTGGCGGT TTTGGTTTGAATCGGCTTTAGTGTTTACGGCACAATGGTTTGGTCAAGTGGTGGCGTTGTTTACCCCTTA ATGCGGCGTTATGTAGGAGCAAGCC <b>ATGAGTAAAGG</b>                                                                                               |
| P3 | <i>V. parahaemolyticus</i> VPD14 | <b>CTCACCAT</b> GGCTTGCTCCTTTTAGTCGCCAGAAAAAGCTAGAAGTCAAATCATGTTTCTAAGCTCAAAA CTTGGCTACTGGTTGTTTGAATTCATAGTTCCATCTTCGACGGTCAAAGCTCAGTTTCATCGGTTCTAAATC AATGCAATGCTATTTTCCAAGCGGTGTTTCGTTCTTTGGTGGTGATAGAGCGGGGCAATCGAAAATCTG TTTTTGGTTGCAAATCTGCTCGGTGAGTTGGTTGGTTTAAAAGCTTATTTACTTGCTGAAATGACGTTTTCT                                                                                                                                                                                                                                                                                                                                                                 |

|    |                                      |                                                                                                                                                                                                                                                                                                                                                                                                                                                                                                                                                                                                                                                  |
|----|--------------------------------------|--------------------------------------------------------------------------------------------------------------------------------------------------------------------------------------------------------------------------------------------------------------------------------------------------------------------------------------------------------------------------------------------------------------------------------------------------------------------------------------------------------------------------------------------------------------------------------------------------------------------------------------------------|
|    |                                      | CTGGTGTGTAAGTTCCACGTGGTTTCAGTGACTTTGTTGAAAGTCCGCACTGTTAGATTGGTTTTCCAAA<br>AGCGCTTTTTGGTGTGTTAGCCCGTTTTCTGCGGCGCTGTTTTTCTAAGTGGTTTCATTGAGTAGCCGCT<br>TTGAGACTACGCCTGACTTAAGTGCATCAAAACACATAAAGTTTGTGTTTGCAAAGTTTAGTTCGGCTTA<br>AAATTGTCGCTCGGTGCCTCGCGACTAACAACTGCTCAAGAGGGATTTCGCAACGCTTGGCATTTTTACT<br>ATGCGTTGAATTTAGTGATTAAGGTGGTATGCGGCGGCTTCGGTATTGCGTTGCTCACCCCTTAGCAGGG<br>CGTTATGTAGGAGCAAGCCATGAGTAAAGG                                                                                                                                                                                                                                 |
| P4 | <i>V. parahaemolyticus</i><br>VPD14  | CTCACCATGGCTTGCTCCTTTTAGGGCAGAGGCAGGAAAGTTCTTTGTTCTTACCTTCTTGTTCCTCTGGC<br>AATTCGCTTTTCGTAGTCGGCAATTAAGCATTGTCGGCTCAACTTCTTGAATCTCTCCAGCCGTA AACAT<br>GCAAAGGTTTCGTGGGTTGCCTCATTAGTTTTTCATTGTCGGTGGTGGATAATTTACTGGCTCAAAGTGTG<br>GCAGGGGCAAGTTAATCTCGGCTTTCGTTCTCGCTGTAAGTTTGTAGCTTTACGTTTCGCTTGCTCAAAAG<br>CAACTTGAACGCTGAAAGTCAGCATTTTGTGGTGTGGATAATATGGGCTGAAACATAGTGGCTTTTGTGG<br>TTCTTGAACCACAAAAGTCAGTGGGTGTTTGTGCTTATAAGGTTTCGGGTAATCTATTTTCAAACCAAC<br>TAAACACTGGTGGGAACTTCGCCTAACAAAGGCGTTTAAAGGCGATTACAAACGCGTGGCGATTTTCAGT<br>TCAAGTCTAGTTTAGTGTTTAAGGTGTAGTGTTAGGTGTGGTGGTTTGCCTTGTTCACCACTAACGCGG<br>CGTTATGTAGGAGCAAGCCATGAGTAAAGG |
| V1 | <i>V. vulnificus</i><br>FDAARGOS_663 | CTCACCATGGCTTGCTCCTTTTATGCTTAATCAGGTAATAATCAGTGGTTTATGGTTTTCTTTGCTCCCTCA<br>GCTTTTCAGTTTGGTGTGTTGTCGGCAAGTTGGCTGTTTTGAGCGCTGTTTTTCGGACATCCATTCTTTGGCG<br>CTGGAATTCAGAGAGTTGCCTCAATCAATTTTGGGTAAGCGCGAGGTTAGGGCGGTTGGCTCAATCAG<br>AAATCCATTTATAGGTTTTCAAACCTCAAACCAGATTTGCCAAAATTCCTAGTCTGATTATCAAACCTATG<br>ATTCATTTTCGGTTTTCTACGTTTTGGTTTTTGTGTTTGTAAATCAAAGTCGAGTTAATCTTGTTTTTAGTAAAA<br>CGTAAGCCATTGAAGCTTAAGCATAACAAGGCGTTTAAAGTGGGATTCATGCCGCGTGGCATTTTGGGTAT<br>GCGGTGAATTTGGTGGTGAAGTGGTCTGCGGAAAGTTGGTTTAGGGCGCACTCACCCCTTAACGCGGC<br>GTTATGTAGGAGCAAGCCATGAGTAAAGG                                                                      |
| V2 | <i>V. vulnificus</i><br>FDAARGOS_663 | CTCACCATGGCTTGCTCCTTTTATGTTTAGTCACGTAATAATCAGTTGGTTGCATCTTTTCTTTGCTTTCTCA<br>GCTTTCTAATTTTGGTCTTGTGTCAGCAAGTTAACTTCAGTGTTCGCTGTTTTCTGGACTCCAATTCGTGGGCG<br>CGAAAATTCAGAGAATTGCCTCATTGAAATTCAGTGCCTTGTGAGTCGAATGAAGCTGCCTTAGTTTT<br>AAGTTTGTGCTCAAGTTTTCTGTTTCTCACGCTAAAACCCAAAGTCATTAAAACCTAAATTTATGAGTTAAT<br>TCAGCTTTTGTAGCGTCTGGTTTTGGTTTTGCAAAGGTAAGTCGAGTTAAGCTCTTGGTATCGCAAACCTAAC<br>CCTTTGTGTCTTAAACATAACAAGGCGTTTAAAGCGGGATTCATGCCGCGTGGCATTTTTGGTTTTGTAGTGA<br>GTTTTGGTGGTGAAGTGGTCTGCGGCAGCTTGGTTTATGCGGCATTCACCCCTTAACGCAGCGTTATGTA<br>GGAGCAAGCCATGAGTAAAGG                                                                         |

|    |                                      |                                                                                                                                                                                                                                                                                                                                                                                                                                                                                                                                                                                |
|----|--------------------------------------|--------------------------------------------------------------------------------------------------------------------------------------------------------------------------------------------------------------------------------------------------------------------------------------------------------------------------------------------------------------------------------------------------------------------------------------------------------------------------------------------------------------------------------------------------------------------------------|
| V3 | <i>V. vulnificus</i><br>FDAARGOS_663 | CTCACCATGGCTTGCTCCTTTTATGTTTATGTCACGTAAAATCAGTTGGTTGCATCTTTTCTTTGTACTCTCG<br>GCTTTCTAATTTTGGTCTTGTTCGGCAGGTTAACTTCAGTGTTCGCTGTTTTCTGGACTCCAATTCGTGGGCG<br>CTAAAAATTCAGAGAGTTGCCTCATTAAAGTTCAGTGCGTTTTTGTAGTCGAATGAAGCGATCTTAGTTTC<br>AAAGTTTGAGCACCAGTTTTTCGGTTTCTCACGCTAAAACCTCAATATCAGTACAATCAAATTTATGAGTTA<br>ATTCAGTTTTTTAGCTTCTAGTTTTGGTTTTGCAAAGTTAAGTCGAGTTAAGCTATTGGTTTCGTAAAACCT<br>AACCCTTTGTGTCTTAAACATAACAAGGCGTTTAAGAGGGATTTCATGCCGCGTGGCATTTTTTGGTATGCG<br>GTTGGTTTTGGTGGTGAAAGTGGTCTGCGGAAGGTTTCGTTTATGCGGCATTCACCCCTTAACGCGGCGTT<br>ATGTAGGAGCAAGCCATGAGTAAAGG |
| V4 | <i>V. vulnificus</i><br>FDAARGOS_663 | CTCACCATGGCTTGCTCCTTTTATGCTTAATCACGTAAAATCAGTGGTTTATGGTTTTTCTTTGTTCCCTAG<br>GCTTTTCAGTTTTTGTGTTTGTTCGGCAAGCCAGCTTTTTTGTAGCACTGTTTTTTCGGACTTATTCTTTGGCG<br>CTGGAAATTCAGAGAATTACCTCATTCAATTCTCGGGCAAGCGGAGGTTAGGGCGGTTGGCTCAATCAG<br>AAATCCATTTTTAGTTTTCAACTCCAAGCCAGTTTTGCCAAAATCCGAAGTCTGATTATCAAAACTATGA<br>TTCATTTTCGGTTTTTCTACGTTTTGGTTTTTGTGTGTAATCAAAGTCGAGTTAATCTTGGTTTTGGTCAAAC<br>GTAACCCATTGAAGCTTAAGCATAACAAGGCGTTTAAGCGGGATTTCATGCCGCGTGGCATTTTGGTTTTG<br>CGGTGAGTTTTGGTGGTGAAAGTGGTCTGCAGAAGCTTGGTTTATGCGGCATTCACCCCTTAACGCGGCG<br>TTATGTAGGAGCAAGCCATGAGTAAAGG    |
| V5 | <i>V. vulnificus</i><br>FDAARGOS_663 | CTCACCATGGCTTGCTCCTTTTATGTTTATGTCACGTAAAATCAGTTGGTTGCATCTTTTCTTTGTTCCCTCG<br>TATTTCTAATTTTGGTCTTGTTCGGCAAGTTAAATTCAGTGGTCGCTGTTTTCTGGACTCCAATTCGTGGGC<br>GCTAAAAATTCAGAGTGTTCCTCATTAAAGTTCAGTGCGTTTTGTGAGTCGAATGAAGCGATGTTAGTTTC<br>AACGTTTGAGCACCAGTTTTTCGGTTTCTCACGCTAAAACCTCAATATCAGTACAATCAAATTTATGAGTTA<br>ATTCAGCTTTTTAGCTTCTAACTTTGGTTTTTCAAAGTTAAGTCGAGTTAAGCTCTTGGTATCGTAAAACCT<br>AACCCTTTGAGCCTTAAACATAACAAGGCGTTTAAGCGGGATTTCATGCCGCGTGGCATTTTTTGGTTTTGCG<br>TTGAGTTTTGGTGGTGAAAGAGGTCTGCGGAAACTTGGTTTAGGCGGCACTCACCCCTTAACGCAGCGTT<br>ATGTAGGAGCAAGCCATGAGTAAAGG  |
| V6 | <i>V. vulnificus</i><br>FDAARGOS_663 | CTCACCATGGCTTGCTCCTTTTATGTTTATGTCACGTAAAACAGTGGGTTGCATCTATTCTTTGTTTTCTTCG<br>TATTTCTAATTTTGGTCTTGTTCGGCAAGTTACGTTTATGTTGGTCGCTGTTTTCTGGACTCCAATTCGTGGGCG<br>CTAAAAATTCAGAGAGTTGCCTCATTGAATTCAGAAATGTAGGCGAGGTTGAGTGAAGTGATTTTGATTTTC<br>AAAGTTAGAGCCCCATTTTTGATTTCTCACGTTATAAGTCAAAGTCGGCACAATCAAATTTATGATTTA<br>ATTCAGCTTTTTAGCGTCTGGTTTTGGTTTTGCAAAGGTAAGTCGAGTTAAGCTATTGGTATCGCAAACCTA<br>ACCCTTTGAGCCTTAAACATAACAAGGCGTTTAAGAGGGATTTCATGCCGCGTGGCATTTTTTGGTATGCGG<br>TGAGTTTTGGTGGTGAAAGTGGTCTGCGGAAGCTTGGTTTATGCGGCATTCACCCCTTAACGCGGCGTTA<br>TGTAGGAGCAAGCCATGAGTAAAGG   |

|     |                                      |                                                                                                                                                                                                                                                                                                                                                                                                                                                                                                                                                                              |
|-----|--------------------------------------|------------------------------------------------------------------------------------------------------------------------------------------------------------------------------------------------------------------------------------------------------------------------------------------------------------------------------------------------------------------------------------------------------------------------------------------------------------------------------------------------------------------------------------------------------------------------------|
| V7  | <i>V. vulnificus</i><br>FDAARGOS_663 | CTCACCATGGCTTGCTCCTTTTATGCTTAATCACGTAAAATCAGTGGTTTATGGCTTTTCTTTGTTCCCTCA<br>GCTTTTTGACTTTGAGCTCGTCGGCAAGTTGGTTTCAGTGGGCGCTGTTTTCTGGACACTTATTCTTTGGC<br>GCTGGAAGTTCAGAGAATTGCCTAAATCAGTTTTCGCGTAAGCGCGAGGTTAGGGCAGTTGGCTTAATCA<br>GATATTTGAACTTGGCTTTTTGAGTTTTAGTCGCCAAATTTCAAAGTCCGATTTTTAAAACAATGAGTCAT<br>TTCGGTTTTCTACGTTTTGTCTTTTGTGTTGTAATCAAAGTCGAGTTAATCTTGGTTCTAGCAAACGTAAC<br>CCATTGAAGCTTAAGCATAACAAGGCGTTCAAGAGGGATTTCATGCCGCGTGGCATTTTTTGGTATGCGGCG<br>AGTTTTGGTGGTGAAAGTGGTCTGCTGAAGGTTGGTTTGGAGCGGCACTCACCCCTTAACGCAGCGTTATG<br>TAGGAGCAAGCCATGAGTAAAGG        |
| V8  | <i>V. vulnificus</i><br>FDAARGOS_663 | CTCACCATGGCTTGCTCCTTTTATGCTTAATCACCTAAAATCAGTGGTTTATGGTTTTTCTTTGTTCCCTAG<br>GCTTTTCAGTTTTGTGTTTGTGCGCAAGCTGGCTTTTTTGGAGCGCTGTTTTTCGGACACTTATTCTTTGGCG<br>CTAGAAATTCAGAGAATTGCCTCATTCAATTCTTGGGCAAGCGCGAGGTTAGGGCTGTTGGCTCAATCAG<br>AGATTTGATCTTAGGTTTTTTCGTTTTAGCTGCCAAATTTCAAAGTCTGATTTTTCAAATCATGAGTCATTT<br>CAGTTTTTTGGTTTTTGGCTTTTGTGTTGTAATCAAAGTCGAGTTAATCTTGTTTTTAGTAAAACGTAAGCC<br>ATTGAAGCTTCAGCATAACAAGGCGTTAAGCGGGATTTCATGCCGCGTGGCATTTTTTGGTTTGCAGTGAG<br>TTTTGGTGGTGAAAGTGGTGTGCGGAAGGTTGGTTTATGCGGCATTCACCCCTTAACGCAGCGTTATGTA<br>GGAGCAAGCCATGAGTAAAGG        |
| V9  | <i>V. vulnificus</i><br>FDAARGOS_663 | CTCACCATGGCTTGCTCCTTTTATGTTTATGCTTAATCACGTAAAATCAGTGGTTGTCATCTTTTCTTTGCTTTCTCA<br>GCTTTCTGATTTTTGGTCTTGTGCGCAAGTTACGTTTATGTTGCTGCTGTTTTCTGGACTCCAATTCGTGGAC<br>GCTAAAAATTCAAAGAGTTGCCTCATTGAAATTCAGTGCCTTGTGAGTCGAATGAAGCGATGTTAGTTT<br>CAACGTTTGAGCACCAGTTTTTCGGTTTCTCTCGCTAAAATCTCAATATCAGTACAATCAAATTTATGAGTT<br>AATTCAGCTTTTTAGCTTCTAACTTTGGTTTTCAAAGATAAGTCGAGTTAAGCTCTTGGTATTGCAAACT<br>TACCCCTTTGAGTCTTAAACATAACAAGGCGTTAAGAGGGATTTCATGCCGCGTGGCATTTTTTGGTTTGC<br>GTGAGTTTTGGTGGTGAAAGTGTCTGCGGAAAGTTGATTTATGCGGCATTCACCCCTTAACGCAGCGTT<br>ATGTAGGAGCAAGCCATGAGTAAAGG |
| V10 | <i>V. vulnificus</i><br>FDAARGOS_663 | CTCACCATGGCTTGCTCCTTTTATGCTTAATCACGTAAAATCAGTGGTTTATGGTTTTTCTTTGTTCCCTCG<br>GCTTTTCATTTTTGTGTTTGTGCGCAAGTTGGCTTTTGTGAGCGCTGTTTTTCGGACACTTATTCTTTGGCG<br>CTGGAATTCAGAGAATTGCCTCATTCAATTCTTGGGTAAGCGCGAGGTTAGGGCGGTTGGCTCAATCAG<br>AAATCCATTTCTAGGTTTTCAAATTCAAAATGGATTTGCCAAAATCCCGAACCTGAATATCAAACCTAT<br>GATTCATTTAGTTTTCTACGTTTTGGTTTTTGTGTTGTAATCAAAGTCGAGTTAATCTTGTTTTTAGTAAA<br>ACGTAAGCCATTGAAGCTTAAGCATAACAAGGCGTTAAGAGGGATTTCATGCCGCGTGGCATTTTTTGGTT<br>TGCAGTGAGTTTTGGTGGTGAAATGGTCTGCGGAAAGTTGGTTTATGCGGCATTCACCCCTTAACGCAG<br>CGTTATGTAGGAGCAAGCCATGAGTAAAGG      |



|         |                                      |                                                                                                                                                                                                                                                                                                                                                                                                                                                                                                                                                                         |
|---------|--------------------------------------|-------------------------------------------------------------------------------------------------------------------------------------------------------------------------------------------------------------------------------------------------------------------------------------------------------------------------------------------------------------------------------------------------------------------------------------------------------------------------------------------------------------------------------------------------------------------------|
| V11     | <i>V. vulnificus</i><br>FDAARGOS_663 | CTCACCATGGCTTGCTCCTTTTATGTTTAATCACGTAAAATCAGCCGGTTGCATCTTTTCTTTGTTCCCTTCG<br>CATTTCCAATTTTGGTCTTGTTCGGCAAGTTGGCTTTCGGTGGTTCGCTGGTTTCTGGACTCCAATTCGTGGG<br>CGCGAAAAATCTGAGAGTTGCCTCATTAAAGCTCAGTGCCTTTGTGAGTCGAATAAAGCGTCTTAGTTT<br>CAAAGTTTGAGCTCCAGCTTTCGGTTTCTCACGCTAAAATCAAATCATTAGAATCAAATTTATGAGTT<br>AATTCAGCTTTTGTAGCGTCTGATTTTGGTTTTAAAGGTAAGTTCGAGTTAAGCTCTTGGTATCGCAAACT<br>TAACCCTTTGAGCCTTAAACATAACAAGGCGTTTAAAGAGGGATTTCATGCCGCGTGGCATTTTTAGTATGC<br>GGTGAGTTTTGGTGGTCAAAGTGGTCTGCGGAACTTGGTTTAGGCGGCACTCACCCCTTAAACGCGGCGT<br>TATGTAGGAGCAAGCCATGAGTAAAGG |
| V12     | <i>V. vulnificus</i><br>FDAARGOS_663 | CTCACCATGGCTTGCTCCTTTTATGCTTAATCACGTAAAATCAGTTGGTTATGGTTTTTCTTTGTTCCCTTCG<br>GCTTTTCAGTTCGGTGTGTTGTTCGGCAAGTTGGCTTCTTAGAGCGCTGTTTTTCGGACATTTATTCTTTGGCG<br>CTGGAAATTCAGAGAGTTGCCTCAGTCAATTTTCGGGTAAGCGCTAGGTTAGGGTAGTTGGCTCAATCAG<br>AAATTTGATCTTAGGTTTTTTCGTTTTGGCTGCCACAGTTCAAAGTCTGATTTTCAAATCATGAGTCATTT<br>CAGTTTTTTGGTTTTTGGCTTTTGTGTGTAATCAAAGTCGAGTTAATCTTGGTTTTGGTCAAACGTAACC<br>CATTGAAGCTTAAGCATAACAAGGCGTTTAAAGAGGGATTTCATGCCGCGTGGCATTTTTGGTTTGCAGTGA<br>GTTTTGGTGGTGAATAATGGTCTGCGGAAAGTTGGTTTATGCGGCATTCACCCCTTAAACGAGCGTTATGT<br>AGGAGCAAGCCATGAGTAAAGG |
| V13     | <i>V. vulnificus</i><br>FDAARGOS_663 | CTCACCATGGCTTGCTCCTTTTATGTTTATGTCACGTAAAATCAGTTGGTTGCAGATTTTTTTGCTTTCTAAT<br>TTTGGCCTTGTTCGGCAAGCTGGCTTTCGGTGGTTCGCTGTTTTCTGGACTCCAATTCGTGGGCGCTAAAAT<br>TCTGAGAGTTGCCTCATTAAAGCTCAGTGCCTTTGTGAGTCGAATAAAGCGTCTTAGTTTCAAAGTTTGA<br>GCTCTAGTTTTCTGTTTCTCACGTTAAAATCAAAGTTAGCACAATCAAATTTATGATTTAATTCAGCTTTT<br>TAGCGTCTGGTTTTGGTTTTGCAAAGGTAAGTTCGAGTTAAGCTATTGGTATCGCAAACTTAAACCCTTTGAGC<br>CTTAAACATAACAAGGCGTTTAAAGCGGGATTTCATGCCGCGTGGCATTTTTTGTTTTGCGGTGATTTTTGGTG<br>GTGAAAGTGGTCTGCAGAAGCTTGGTTTATGCGGCATTCACCCCTTAAACGCGGCGTTATGTAGGAGCAAG<br>CCATGAGTAAAGG      |
| lacZ450 | <i>V. cholerae</i><br>N16961         | AAACCCGCACATCGTTAAATGGCACTGCCGTACACCCCATGTTCCCTTGCACAGTTATCGCACTGAGCAG<br>GAGGCTCGTTTGGATGTTGGGGGGAATCGCCAATCTCTAAATGGTTCAGTGGCGGTTTGGCTCTGTTTGA<br>AGCCAGAAGCGGTTGAGCCTGCGGTGATAGACCCGATTTTCGATGATAGCGCTTGGGCGCACATTCCTGT<br>ACCGAGTAAGTGGCAGATGCAAGGCTTTGATAAGCCGATTTACACCAATATCCAATATCCATTTGCGGAT<br>CGGCCGCTTACGTGCCGCAAGATAATCCAACCGGCTGTTATCGCCACCGTTTTACTGGAAAAACAAG<br>CGCTAACCGAGTCCATTCGCATTGATTTGATGGGGTCAATTCGGCATTTCATCTGTGGTGAATGGTCAT<br>TGGGTTCGGTTATTCGCAAGATAGCCGCTT                                                                                  |

|                |                              |                                                                                                                                                                                                                                                                                                                                                                                                                                                                                                                                                                                                                                                                                                            |
|----------------|------------------------------|------------------------------------------------------------------------------------------------------------------------------------------------------------------------------------------------------------------------------------------------------------------------------------------------------------------------------------------------------------------------------------------------------------------------------------------------------------------------------------------------------------------------------------------------------------------------------------------------------------------------------------------------------------------------------------------------------------|
| <i>lacZ550</i> | <i>V. cholerae</i><br>N16961 | AAACCCGCACATCGTTAAATGGCACTGCCGTACACCCCATGTTCCCTTGGCACAGTTATCGCACTGAGCAG<br>GAGGCTCGTTTGGATGTTGGGGGGAATCGCCAATCTCTAAATGGTCAGTGGCGGTTTGCTCTGTTTGA<br>AGCCAGAAGCGGTTGAGCCTGCGGTGATAGACCCGGATTTGATGATAGCGCTTGGGCGCACATTCCTGT<br>ACCGAGTAACTGGCAGATGCAAGGCTTTGATAAGCCGATTTACACCAATATCCAATATCCATTTGCGGAT<br>CGGCCGCCTTACGTGCCGCAAGATAATCCAACCGGCTGTTATCGCCACCGTTTTACTGGAAAAACAAG<br>CGCTAACCGAGTCCATTCGCATTGTATTTGATGGGGTCAATTCGGCATTTCATCTGTGGTGCAATGGTCAT<br>TGGGTCGGTTATTCGCAAGATAGCCGCTTGCCTGCCGAGTTTGAGTTAACCCCTTATCTACAAGAGGGTG<br>AAAACCTGTTGGTGGCCATGGTGCTGCGCTGGTCTGATGGCTCTTATTTGGAAGACCAA                                                                                                             |
| <i>lacZ650</i> | <i>V. cholerae</i><br>N16961 | AAACCCGCACATCGTTAAATGGCACTGCCGTACACCCCATGTTCCCTTGGCACAGTTATCGCACTGAGCAG<br>GAGGCTCGTTTGGATGTTGGGGGGAATCGCCAATCTCTAAATGGTCAGTGGCGGTTTGCTCTGTTTGA<br>AGCCAGAAGCGGTTGAGCCTGCGGTGATAGACCCGGATTTGATGATAGCGCTTGGGCGCACATTCCTGT<br>ACCGAGTAACTGGCAGATGCAAGGCTTTGATAAGCCGATTTACACCAATATCCAATATCCATTTGCGGAT<br>CGGCCGCCTTACGTGCCGCAAGATAATCCAACCGGCTGTTATCGCCACCGTTTTACTGGAAAAACAAG<br>CGCTAACCGAGTCCATTCGCATTGTATTTGATGGGGTCAATTCGGCATTTCATCTGTGGTGCAATGGTCAT<br>TGGGTCGGTTATTCGCAAGATAGCCGCTTGCCTGCCGAGTTTGAGTTAACCCCTTATCTACAAGAGGGTG<br>AAAACCTGTTGGTGGCCATGGTGCTGCGCTGGTCTGATGGCTCTTATTTGGAAGACCAAGATATGTGGTG<br>GCTGAGTGGCATCTTTCGCGATGTGTATCTCTACCGCAAGCCGATACTCGCGATTGAAGATTTTTTTATCC<br>GCACTGAATTAGATGCGC |

**Supplementary Table S2.** Primers used in this study.

| <b>Oligo</b>           | <b>Sequence (5' → 3')</b>                        | <b>Description</b>                                                                     |
|------------------------|--------------------------------------------------|----------------------------------------------------------------------------------------|
| bb_pSU38_long_F        | CTCACCATGGCTTGCTCCTTAGG<br>AGCAAGCCATGAGTAAAGG   | Construction of pDProm.<br>Amplification of pA369<br>backbone.                         |
| bb_pSU38_long_R        | GGACGAGCTGTACAAGTAAAAT<br>TGC GTT GCGCTCACTGC    | Construction of pDProm.<br>Amplification of pA369<br>backbone.                         |
| bb_pSU38_F             | AGGAGCAAGCCATGAGTAAAGG                           | Amplification of pDProm<br>backbone for cassettes<br>cloning.                          |
| bb_pSU38_mCherry<br>_R | AAGGAGCAAGCCATGGTGAG                             | Amplification of pDProm<br>backbone for cassettes<br>cloning.                          |
| pDProm_lacZ_F          | CTCACCATGGCTTGCTCCTTAAA<br>CCCGCACATCGTTAAAT     | Amplification of <i>lacZ</i> gene.                                                     |
| pDProm_lacZ450_R       | CCTTTACTCATGGCTTGCTCCTA<br>AGCGGCTATCTTGCGAATAA  | Amplification of <i>lacZ</i> gene.<br>Construction of pDProm-<br><i>lacZ</i> 450.      |
| pDProm_lacZ550_R       | CCTTTACTCATGGCTTGCTCCTTT<br>GGTCTTCCAAATAAGAGCCA | Amplification of <i>lacZ</i> gene.<br>Construction of pDProm-<br><i>lacZ</i> 550.      |
| pDProm_lacZ650_R       | CCTTTACTCATGGCTTGCTCCTG<br>CGCATCTAATTCAGTGCG    | Amplification of <i>lacZ</i> gene.<br>Construction of pDProm-<br><i>lacZ</i> 450.      |
| MRVII                  | GGTTTCCCGACTGGAAAGCG                             | Check of insert presence in<br>pDProm.                                                 |
| MFD                    | CGCCAGGGTTTTCCAGTCAC                             | Check of insert presence in<br>pDProm.                                                 |
| bb_pSU38_dfrB9_F       | CGTTAGGCGTCGAGCTGCTCTAG<br>ACAGCGCCGTCGTTGC      | Construction of pDProm-<br><i>dfrB9</i> . Backbone<br>amplification.                   |
| bb_pSU38_dfrB9_R       | TTCGCATTGCGGGGCCTAACAAG<br>GAGCAAGCCATGGTGAG     | Construction of pDProm-<br><i>dfrB9</i> . Backbone<br>amplification.                   |
| dfrB9_pSU38_F          | CTCACCATGGCTTGCTCCTTGTT<br>AGGCCCCGCAATGCGAA     | Construction of pDProm-<br><i>dfrB9</i> . Cassette<br>amplification.                   |
| dfrB9_pSU38_R          | GCAACGACGGCGCTGTCTAGAG<br>CAGCGTCGACGCCTAACG     | Construction of pDProm-<br><i>dfrB9</i> . Cassette<br>amplification.                   |
| Plac_dfrB9_F           | TCACACAGGAAACAGCTATGGT<br>TAGGCCCCGCAATGCGAA     | Construction of pDProm<br>P <sub>lac</sub> - <i>dfrB9</i> . Cassette<br>amplification. |
| bb_pSU38_plac_R        | TTCGCATTGCGGGGCCTAACCAT<br>AGCTGTTTCCTGTGTGA     | Construction of pDProm<br>P <sub>lac</sub> - <i>dfrB9</i> . Backbone<br>amplification. |
| bb_dfrB9_E7_F          | CACTTAACGCGGCGTTATGTGTT<br>AGGCCCCGCAATGCGAA     | Construction of pDProm<br>E7- <i>dfrB9</i> . Backbone<br>amplification.                |

|                |                                                |                                                                                               |
|----------------|------------------------------------------------|-----------------------------------------------------------------------------------------------|
| E7_dfrB9_R     | TTCGCATTGCGGGGCCTAACACA<br>TAACGCCGCGTAAAGTG   | Construction of pDProm<br>E7- <i>drfB9</i> . Cassette<br>amplification.                       |
| bb_dfrB9_D11_F | GTGTTATGCAGGCGTTATGTGTT<br>AGGCCCCGCAATGCGAA   | Construction of pDProm<br>D11- <i>drfB9</i> . Backbone<br>amplification.                      |
| D11_dfrB9_R    | TTCGCATTGCGGGGCCTAACACA<br>TAACGCCTGCATAACAC   | Construction of pDProm<br>D11- <i>drfB9</i> . Cassette<br>amplification.                      |
| bb_dfrB9_C12_F | CCCTTAGGCGGGCGTTATGTGTT<br>AGGCCCCGCAATGCGAA   | Construction of pDProm<br>C12- <i>drfB9</i> . Backbone<br>amplification.                      |
| C12_dfrB9_R    | TTCGCATTGCGGGGCCTAACACA<br>TAACGCCCGCCTAAGGG   | Construction of pDProm<br>C12- <i>drfB9</i> . Cassette<br>amplification.                      |
| bb_dfrB9_D1_F  | CCCTTAGGCGGGCGTTATGTGTT<br>AGGCCCCGCAATGCGAA   | Construction of pDProm<br>D1- <i>drfB9</i> . Backbone<br>amplification.                       |
| D1_dfrB9_R     | TTCGCATTGCGGGGCCTAACACA<br>TAACGCCCGCCTAAGGG   | Construction of pDProm<br>D1- <i>drfB9</i> . Cassette<br>amplification.                       |
| bb_dfrB9_F11_F | CCCTTAACGCGGCGTTATGTGTT<br>AGGCCCCGCAATGCGAA   | Construction of pDProm<br>F11- <i>drfB9</i> . Backbone<br>amplification.                      |
| F11_dfrB9_R    | TTCGCATTGCGGGGCCTAACACA<br>TAACGCCGCGTAAAGGG   | Construction of pDProm<br>F11- <i>drfB9</i> . Cassette<br>amplification.                      |
| C7_dfrB9_F     | GCCTCACCTCGAACGTTATGCTT<br>AATCCATAAAAATCAGC   | Construction of pDProm-<br>C8-dfrB9-C7. Cassette<br>amplification.                            |
| C7_dfrB9_R     | GAGCAGCGTCGACGCCTAACGC<br>CCGCCTAAGGG          | Construction of pDProm-<br>C8-dfrB9-C7. Cassette<br>amplification.                            |
| F1_dfrB9_F     | TTTGCGCCTCACCTCGAACGTTA<br>TACGAAATCAATGACGTCC | Construction of pDProm-<br>C8-dfrB9-F1. Cassette<br>amplification.                            |
| F1_dfrB9_R     | AGAGCAGCGTCGACGCCTAACACA<br>CCTGCATAACACGTTTGC | Construction of pDProm-<br>C8-dfrB9-F1. Cassette<br>amplification.                            |
| pSU_dfrB9_F    | TTAGGCGTCGACGCTGC                              | Construction of pDProm-<br>C8-dfrB9-F1 and pDProm-<br>C8-dfrB9-C7. Backbone<br>amplification. |
| pSU_dfrB9_R    | CGTTCGAGGTGAGGCG                               | Construction of pDProm-<br>C8-dfrB9-F1 and pDProm-<br>C8-dfrB9-C7. Backbone<br>amplification. |
| gyrA_rt_F      | GAGCCAAAGTTACCTTGCC                            | <i>gyrA</i> amplification for RT-<br>qPCR                                                     |

|               |                                                 |                                          |
|---------------|-------------------------------------------------|------------------------------------------|
| gyrA_rt_R     | AATGTGCTGGGCAACGACTG                            | <i>gyrA</i> amplification for RT-qPCR    |
| gyrA_PRB      | [5SUN]-CACCTCAT-[ZEN]-GGTGACAGTGCGGTTT-[IBFQ]   | <i>gyrA</i> probe for RT-qPCR            |
| gfp_rt_F      | GGTGAAGGTGATGCAACATA                            | <i>gfp</i> amplification for RT-qPCR     |
| gfp_rt_R      | GAAGACCATACGCGAAAGTAG                           | <i>gfp</i> amplification for RT-qPCR     |
| gfp_PRB       | [6FAM]-ACCTGTTCC-[ZEN]-ATGGCCAACACTTGTCA-[IBFQ] | <i>gfp</i> probe for RT-qPCR             |
| mCherry_rt_F  | CTACTTGAAGCTGTCCTTCC                            | <i>mCherry</i> amplification for RT-qPCR |
| mCherry_rt_R  | TAGATGAACTCGCCGTCT                              | <i>mCherry</i> amplification for RT-qPCR |
| mCherry_PRB   | [56FAM]-TCAAGTGGG-[ZEN]-AGCGCGTGATGAACT-[IBFQ]  | <i>mCherry</i> probe for RT-qPCR         |
| F1_gsp1_R     | GCGGCAAACCCAAAGAAATCTA                          | 5'RACE of cassette F1                    |
| F1_gsp2_R     | GAATGCCGAATGTAGCAAATCG                          | 5'RACE of cassette F1                    |
| F1_gsp3_F     | CAGTTAGTAAGGCAGTGTCAATGT                        | 5'RACE of cassette F1                    |
| F1_gsp4_R     | CATCTTATCACAGCTAAAACAACAC                       | 5'RACE of cassette F1                    |
| F1_ant_gsp1_R | CTCCTTTTATACGAAATCAATGACG                       | 5'RACE of cassette F1 (antisense)        |
| F1_ant_gsp2_R | CAGTTAGTAAGGCAGTGTCAATGT                        | 5'RACE of cassette F1 (antisense)        |
| F1_ant_gsp1_R | TTAACGCGGCAAACCCAAAG                            | 5'RACE of cassette F1 (antisense)        |
| F2_gsp1_R     | CCACAATAACACGTGCGAAAGA                          | 5'RACE of cassette F2                    |
| F2_gsp2_R     | GACTGACTTACAAAACCAATTATACTC                     | 5'RACE of cassette F2                    |
| F2_gsp3_F     | GTGTTTCGTTTCATCAGGTTCCGG                        | 5'RACE of cassette F2                    |
| F2_gsp4_R     | TTATACGAGCCTTGCTTTCGC                           | 5'RACE of cassette F2                    |
| C5_gsp1_R     | GGCTGGCAACGCATTACTACT                           | 5'RACE of cassette C5                    |
| C5_gsp2_R     | AAACCCAAACACAACAACCGT                           | 5'RACE of cassette C5                    |
| C5_gsp3_F     | TGATGCTGATTTGGTCGAACG                           | 5'RACE of cassette C5                    |
| C5_gsp4_R     | TCGTAGCCTATTGTTTAACAATGGC                       | 5'RACE of cassette C5                    |
| V11_gsp1_R    | GGTGAGTGCCGCCTAAAC                              | 5'RACE of cassette V11                   |
| V11_gsp2_R    | CAAGTTTCCGCAGACCACTTTC                          | 5'RACE of cassette V11                   |
| V11_gsp3_F    | ATCACGTAAAATCAGCCGGTTG                          | 5'RACE of cassette V11                   |
| V11_gsp4_R    | CCAAGAGCTTAACTCGAGTTACC                         | 5'RACE of cassette V11                   |
| V7_gsp1_R     | CTCAAACCAACCTTCAGCAGAC                          | 5'RACE of cassette V7                    |
| V7_gsp2_R     | CACTTTCACCACAAAACCTCGC                          | 5'RACE of cassette V7                    |
| V7_gsp3_F     | GGTTTATGGCTTTTCTTTGTTCCC                        | 5'RACE of cassette V7                    |

|           |                                  |                          |
|-----------|----------------------------------|--------------------------|
| V7_gsp4_R | TGCTAGAACCAAGATTA<br>ACTCG<br>AC | 5'RACE of cassette V7    |
| M13_F     | CTGGCCGTCGTTTTAC                 | Check insert in pTOPO-TA |
| M13_R     | GTCATAGCTGTTTCCTG                | Check insert in pTOPO-TA |

**Supplementary Table S3.** Putative promoter sequences detected with 5'RACE

| Cassette | TSS position | -10 box | -35 box |
|----------|--------------|---------|---------|
| F1       | 35           | TTATAA  | TTATAC  |
|          | 122 (as)     | ACATGA  | CTCATT  |
|          | 191          | GTGCCG  | TTTAGC  |
|          | 194          | CCGAGG  | AGCCAA  |
|          | 197          | AGGGGG  | CAATGA  |
|          | 240 (as)     | AGCTCC  | CTACAG  |
|          | 283 (as)     | TGAACG  | AGGGCT  |
|          | 317          | GTTCGA  | TGTAGA  |
|          | 364          | TGTTTT  | TTCATA  |
|          | 375          | TGATAA  | CATATC  |
| F2       | 239          | TTTTCC  | TTAGCC  |
|          | 408          | TAATTA  | TTGAGC  |
|          | 430          | TGGTAA  | TTACAG  |
|          | 440          | GTTCTT  | TTTACA  |
|          | 455          | TAATTG  | TGGTAA  |
|          | 466          | AAGCAA  | TTACCA  |
|          | 474          | GTATAA  | AAGTTA  |
|          | 490          | ATCAAC  | GAAAGC  |
| 510      | ATTCGG       | AAGCAA  |         |
| C5       | 220          | AAAATG  | TTCCGC  |
|          | 293          | CGTTTT  | TAACCG  |
|          | 337          | CGTGTG  | CAACGT  |
|          | 346          | GCTTGA  | TTGGAC  |
|          | 367          | TCAAAC  | TTGATT  |
| V7       | 12           | TTATGC  | -       |
|          | 107          | GGGCGC  | AGCTCG  |
|          | 134          | TTGGCG  | GCGCTG  |
|          | 159          | TAAATC  | TTCAGA  |
|          | 165          | TCAGTT  | TGGAAG  |
|          | 185          | AGGTTA  | CTAAAT  |
|          | 252          | AAGTCC  | TGAGTT  |
|          | 261          | TTAAAA  | TAGTCG  |
| V13      | 106          | GTGGTC  | TGGTCT  |
|          | 195          | TAAAGC  | TGCGTT  |
|          | 222          | TCCAGC  | GCGTCT  |
|          | 226          | CTTTCG  | TTAGTT  |
|          | 227          | TTTCGG  | TTAGTT  |
|          | 244          | TAAAAA  | TTCGGT  |

(as): Antisense

**Supplementary Table S4.** Putative promoter position and scores predicted by BPROM

| Gene-less cassette or promoter | Strand    | Score -10 box | Score -35 box | -10 box   | -35 box | LDF  |
|--------------------------------|-----------|---------------|---------------|-----------|---------|------|
| P <sub>cS</sub>                | Sense     | 63            | 66            | TCGTAAACT | TTGACA  | 5,97 |
| P <sub>lac</sub>               | Sense     | 44            | 47            | TCGTATGTT | TTTACA  | 3,94 |
| P <sub>cW</sub>                | Sense     | 47            | 29            | TCGTAAGCT | TGGACA  | 3,10 |
| C1                             | Sense     | 60            | 40            | TTGTAAATT | TTCAAA  | 4,64 |
|                                | Antisense | 32            | 61            | GTGTATTAA | TTGCCA  | 2,37 |
| C2                             | Sense     | 50            | 38            | AGTTCTAAT | TTCATA  | 3,56 |
|                                | Antisense | 67            | 66            | TGTTATGCT | TTGACA  | 6,50 |
|                                |           | 20            | 24            | ATCGACAAT | CTGAAT  | 0,91 |
| C3                             | Sense     | 34            | 36            | AGGTTGAAT | TTGATC  | 2,59 |
|                                | Antisense | 69            | 40            | TTTTAAACT | TTGTTT  | 4,15 |
|                                |           | 5             | 38            | TTTCAGAAC | TTGAAC  | 0,34 |
| C4                             | Sense     | 70            | 0             | GCGTAAAAT | GTGCGT  | 3,59 |
|                                |           | 32            | 30            | CCTGAAAAT | TTATCA  | 1,12 |
|                                | Antisense | 38            | 66            | TGTTAGCTT | TTGACA  | 2,76 |
|                                |           | 24            | 38            | CAGGACAAT | TTGAAC  | 1,60 |
| C5                             | Sense     | 70            | 15            | GCGTAAAAT | GTGCTT  | 2,74 |
|                                | Antisense | 34            | 45            | TTTAACAAT | TTGTTA  | 3,61 |
|                                |           | 77            | -6            | CGCTAAAAT | AAGCCA  | 3,44 |
| C6                             | Sense     | 39            | 46            | CGCTGAAAT | TTCACA  | 3,22 |
|                                | Antisense | 42            | 66            | TGTTAGTTT | TTGACA  | 2,37 |
|                                |           | 47            | 34            | TAGCAAAAT | TTTCTA  | 2,21 |
| C7                             | Sense     | 56            | 30            | CTGTAAATT | ATGAAA  | 3,82 |
|                                |           | 42            | 39            | TGGTGTAT  | TTGTTG  | 0,50 |
|                                | Antisense | 67            | 66            | TGTTATGCT | TTGACA  | 6,50 |
|                                |           | -6            | 55            | GAACGAAAT | TTGAAT  | 1,04 |
| C8                             | Sense     | 70            | 15            | GCGTAAAAT | GTGCTT  | 2,74 |
|                                | Antisense | 34            | 45            | TTTAACAAT | TTGTTA  | 3,61 |
|                                |           | 77            | -6            | CGCTAAAAT | AAGCCA  | 3,44 |
| C9                             | Sense     | 70            | 7             | GCGTAAAAT | GTGTTT  | 2,89 |
|                                |           | 40            | 10            | CTGAAAAAT | ATCAAA  | 1,04 |
|                                | Antisense | 41            | 40            | TTGAATACT | TTCAAA  | 2,32 |
|                                |           | 38            | 66            | TGTTAGCTT | TTGACA  | 2,28 |
| C10                            | Sense     | 70            | 15            | GCGTAAAAT | GTGCTT  | 4,37 |



|     |           |    |    |            |        |      |
|-----|-----------|----|----|------------|--------|------|
|     | Antisense | 38 | 22 | GACTAAGCT  | ATGATG | 2,47 |
| P1  | Sense     | 60 | 25 | GGGTAATCT  | TTGGTT | 5,02 |
|     |           | 56 | 24 | TGGTATTGT  | TTTCTA | 1,84 |
|     | Antisense | 56 | 3  | TGACATAAT  | CTACCA | 2,93 |
|     |           | 45 | 61 | AGTCAAACCT | TTGCCA | 2,02 |
| P2  | Sense     | 59 | 39 | GTGTAACAT  | TTTATA | 3,77 |
|     | Antisense | 38 | 29 | AGCTAACTT  | TGGACA | 4,09 |
| P3  | Sense     | 69 | 55 | GCTTAAAAT  | TTGCAA | 3,97 |
|     |           | 54 | 31 | TGCTATTTT  | TTTCAT | 1,35 |
|     | Antisense | 39 | 55 | TGTTTTGAT  | TTGCAA | 3,40 |
|     |           | 21 | 24 | AAACATGAT  | TAGCCA | 0,79 |
| P4  | Sense     | 60 | 39 | GGGTAATCT  | TTGTTG | 5,54 |
|     | Antisense | 37 | 60 | CCTTATAAG  | TTGAAA | 4,92 |
|     |           | 28 | 61 | AGGTAAGAA  | TTGCCA | 1,05 |
| V1  | Sense     | 57 | 40 | AGTTAATCT  | TTGTTT | 4,55 |
|     | Antisense | 67 | 25 | TGTTATGCT  | ATGAAT | 2,63 |
|     |           | 13 | 55 | TGAAAAGCT  | TTGCCG | 1,01 |
| V2  | Sense     | 22 | 60 | GAGTCGAAT  | TTGAAA | 2,36 |
|     | Antisense | 50 | 20 | AGTTTTAAT  | CTGAAT | 2,63 |
| V3  | Sense     | 60 | 33 | CAGTACAAT  | TTCTCA | 3,21 |
|     | Antisense | 57 | 25 | TGTTATGTT  | ATGAAT | 3,06 |
| V4  | Sense     | 57 | 25 | AGTTAATCT  | TTGTGT | 3,87 |
|     | Antisense | 67 | 25 | TGTTATGCT  | ATGAAT | 2,51 |
| V5  | Sense     | 60 | 33 | CAGTACAAT  | TTCTCA | 3,14 |
|     | Antisense | 57 | 25 | TGTTATGTT  | ATGAAT | 3,06 |
| V6  | Sense     | 58 | 7  | AATTATGAT  | GTCAAA | 4,06 |
|     | Antisense | 57 | 25 | TGTTATGTT  | ATGAAT | 3,06 |
| V7  | Sense     | 57 | 40 | AGTTAATCT  | TTGTTT | 4,07 |
|     | Antisense | 67 | 25 | TGTTATGCT  | ATGAAT | 2,95 |
| V8  | Sense     | 57 | 40 | AGTTAATCT  | TTGTTT | 4,45 |
|     | Antisense | 46 | 38 | ACCTAAGAT  | TTGGCA | 3,03 |
| V9  | Sense     | 77 | 21 | CGCTAAAAT  | TTGAGC | 4,20 |
|     | Antisense | 57 | 25 | TGTTATGTT  | ATGAAT | 2,96 |
|     |           | 7  | 55 | CAGAAAGCT  | TTGCCG | 0,59 |
| V10 | Sense     | 57 | 40 | AGTTAATCT  | TTGTTT | 4,66 |
|     | Antisense | 67 | 25 | TGTTATGCT  | ATGAAT | 2,70 |
| V11 | Sense     | 58 | 33 | CATTAGAAT  | TTCTCA | 2,64 |

|     |           |    |    |           |        |      |
|-----|-----------|----|----|-----------|--------|------|
|     | Antisense | 57 | 25 | TGTTATGTT | ATGAAT | 3,06 |
|     |           | 18 | 32 | AGAAAAGAT | TTGGAA | 0,58 |
| V12 | Sense     | 57 | 25 | AGTTAATCT | TTGTGT | 3,99 |
|     | Antisense | 67 | 25 | TGTTATGCT | ATGAAT | 2,57 |
| V13 | Sense     | 65 | 5  | ATTTATGAT | CTCAAA | 3,35 |
|     | Antisense | 57 | 25 | TGTTATGTT | ATGAAT | 3,71 |
|     |           | 21 | 55 | CAAAAAAAT | TTGCCG | 0,59 |
| F1  | Sense     | 61 | 40 | ATTTATATT | TTGTTT | 9,42 |
|     |           | 46 | 36 | TTTTACAGT | TTTAAT | 2,63 |
|     | Antisense | 53 | 55 | ACTTAATAT | TTGAAT | 6,49 |
|     |           | 76 | 66 | CTGTAAAAT | TTGACA | 6,20 |
| F2  | Sense     | 77 | 47 | GAGTATAAT | TTTACA | 6,16 |
|     |           | 55 | 31 | AACTATTAT | TTTCAT | 3,95 |
|     | Antisense | 44 | 36 | GAGCAAAAT | TTTAAT | 4,65 |
|     |           | 40 | 46 | TGGTTCAAT | TTCACA | 2,81 |
| F3  | Sense     | 76 | 27 | CAGTATAAT | TTCTCG | 4,70 |
|     |           | 31 | 11 | TTTTAAACG | TTCCTC | 2,57 |
|     | Antisense | 47 | 52 | CGGCAAAC  | TTGATG | 4,71 |
|     |           | 70 | 17 | GAGTAAAAT | ATGCTG | 2,41 |

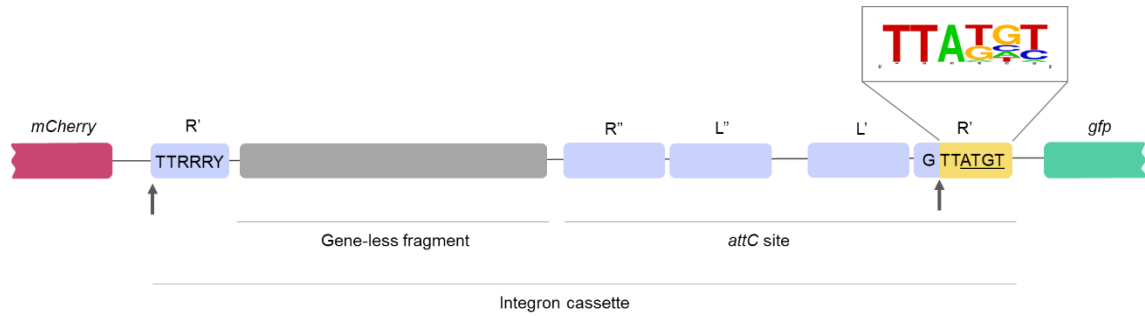

**Supplementary Figure S1. General structure of the synthesized gene-less cassettes cloned in pDProm .** The gene-less DNA fragment for each *Vibrio* spp. was selected including the conserved recombination site *R'* (G↓TTRRRY) from the recombination point marked with an arrow (TTRRRY), the gene-less fragment, and the *attC* site containing the binding domains *R''*, *L''*, *L'* and *R'*. After the GTT of the *R'* recombination point (vertical arrow), the nucleotides ATGT were added to each fragment (yellow box). ATGT were the most prevalent nucleotides from an alignment of all *attC* sites selected in this study (inset).

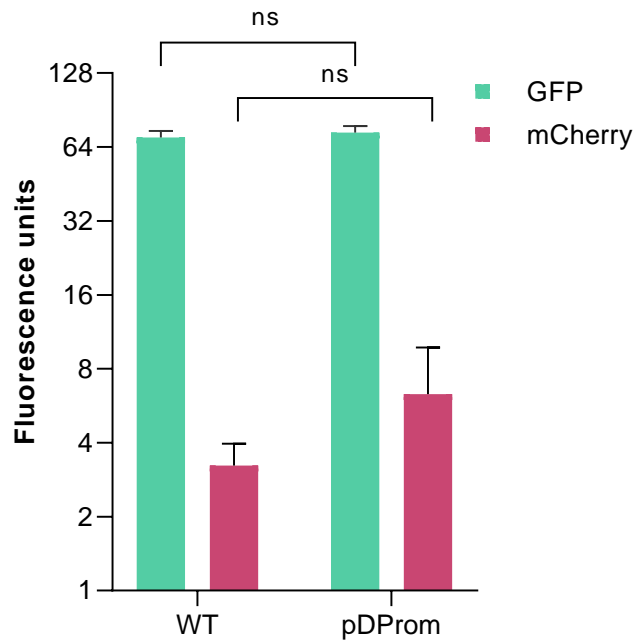

**Supplementary Figure S2. Comparison of fluorescence raw values between *V. cholerae* WT and *V. cholerae* carrying the empty pDProm plasmid.** The fluorescence raw values of both *gfp* (sense) and *mCherry* (antisense) were measured using flow cytometry in *V. cholerae* WT and *V. cholerae* containing the plasmid pDProm without any insert. Error bars represent standard deviation of fluorescence measurements of three biological replicates with two technical replicates each. Paired t-test was performed by comparing the measures obtained for both strains; ns: not significant.

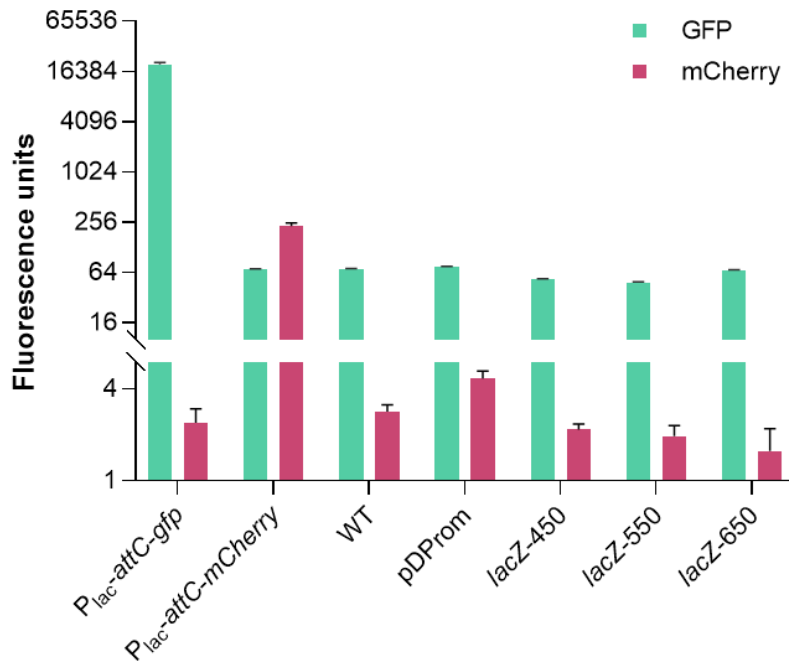

**Supplementary Figure S3. Fluorescence raw values of *V. cholerae* with pDProm and control DNA fragments.** The fluorescence raw values of both *gfp* (sense) and *mCherry* (antisense) were measured using flow cytometry in *V. cholerae* N16961 strains carrying pDProm with control DNA fragments of different sizes (450-, 550-, and 650-bp) originated from the *lacZ* gene. Fluorescence levels were also measured in *V. cholerae* carrying pDProm- $P_{lac-attC-gfp}$ , pDProm- $P_{lac-attC-mCherry}$ , the wildtype strain (WT), and the one harboring the empty pDProm. Error bars represent standard deviation of fluorescence measurements of three biological replicates with two technical replicates each.

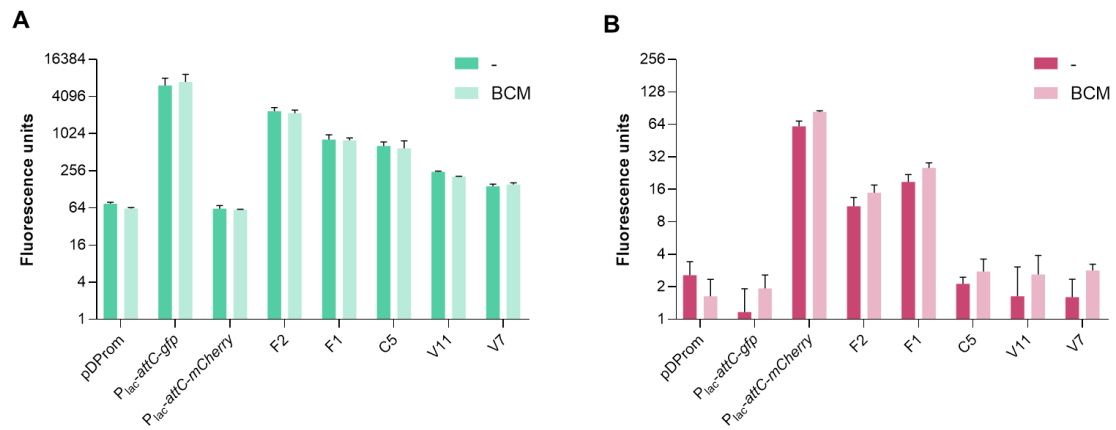

**Supplementary Figure S4. Effect of bicyclomycin (BCM) on fluorescence raw levels of geneless cassettes.** The fluorescence raw values of both (A) *gfp* (sense) and (B) *mCherry* (antisense) were measured using flow cytometry in *V. cholerae* strains carrying pDProm and derivatives with or without 2h-incubation with bicyclomycin (50  $\mu\text{g}/\text{mL}$ ). Error bars represent standard deviation of fluorescence measurements of three technical replicates.

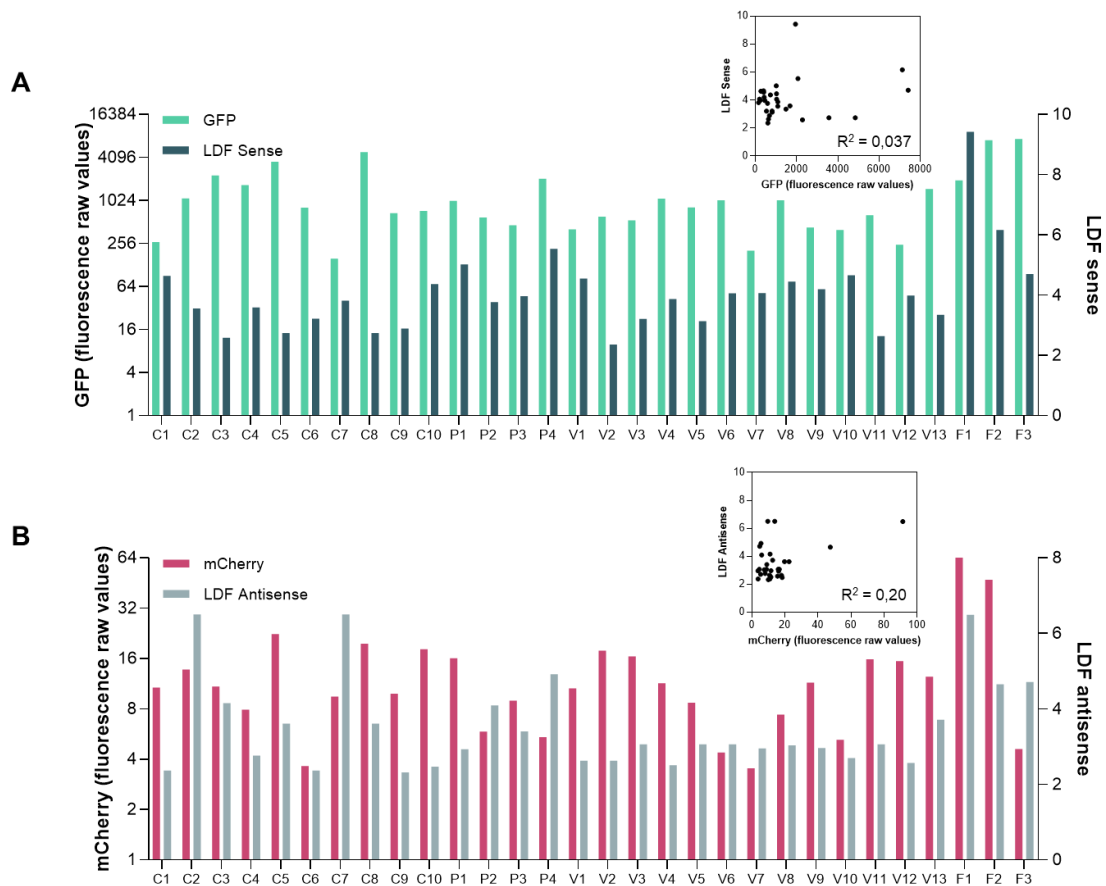

**Supplementary Figure S5. Predicted promoter strength for the *Vibrionaceae* gene-less cassettes compared with the observed expression.** Mean of raw *gfp* fluorescence values (left Y axis) and predicted LDF score of the sense strand by BPROM (right Y axis) of all the selected *Vibrionaceae* cassettes (**A**). Mean of raw *mCherry* fluorescence values (left Y axis) and predicted LDF score of the antisense strand by BPROM (right Y axis) of all the selected *Vibrionaceae* cassettes (**B**). GFP and mCherry fluorescence values do not correlate with the sense and antisense LDF values, respectively (insets:  $R^2=0,037$ ;  $R^2=0,20$ ). The fluorescence mean is calculated from measurements of three biological replicates with two technical replicates each. LDF, linear discriminant function.

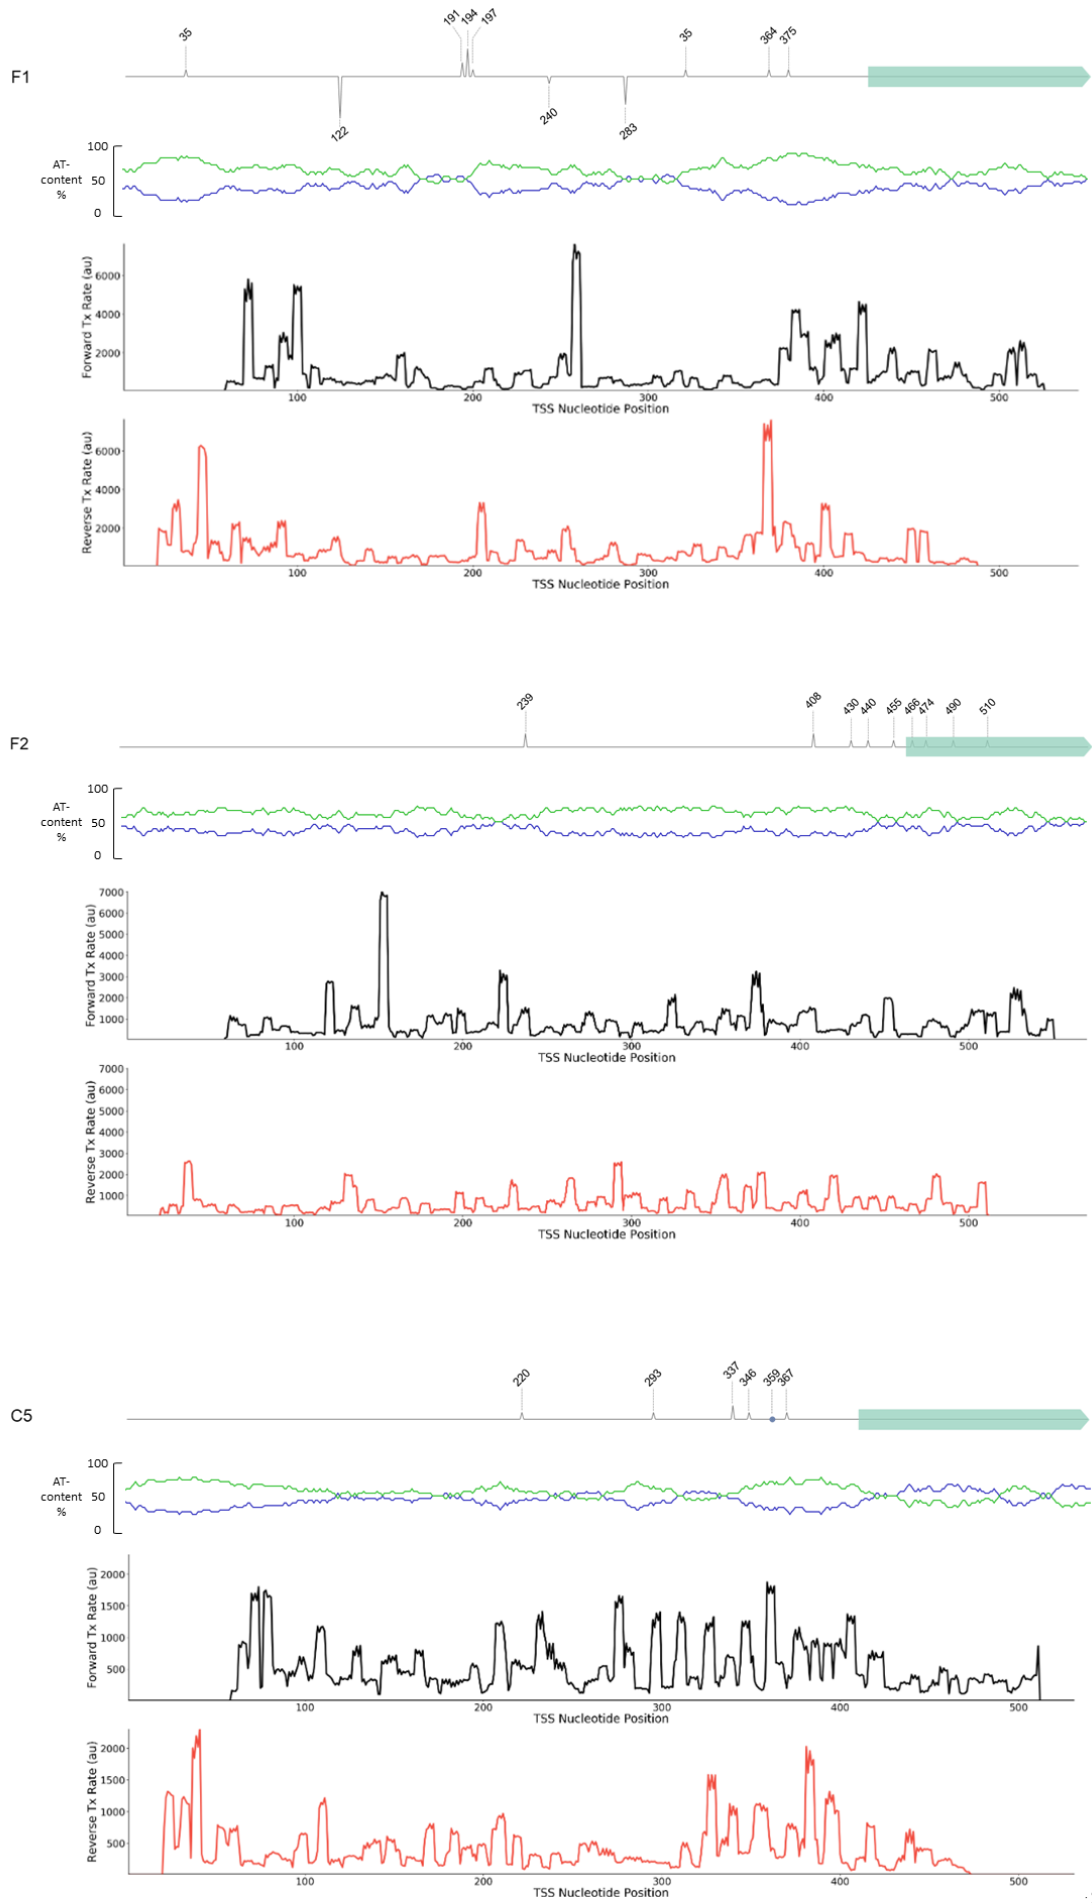



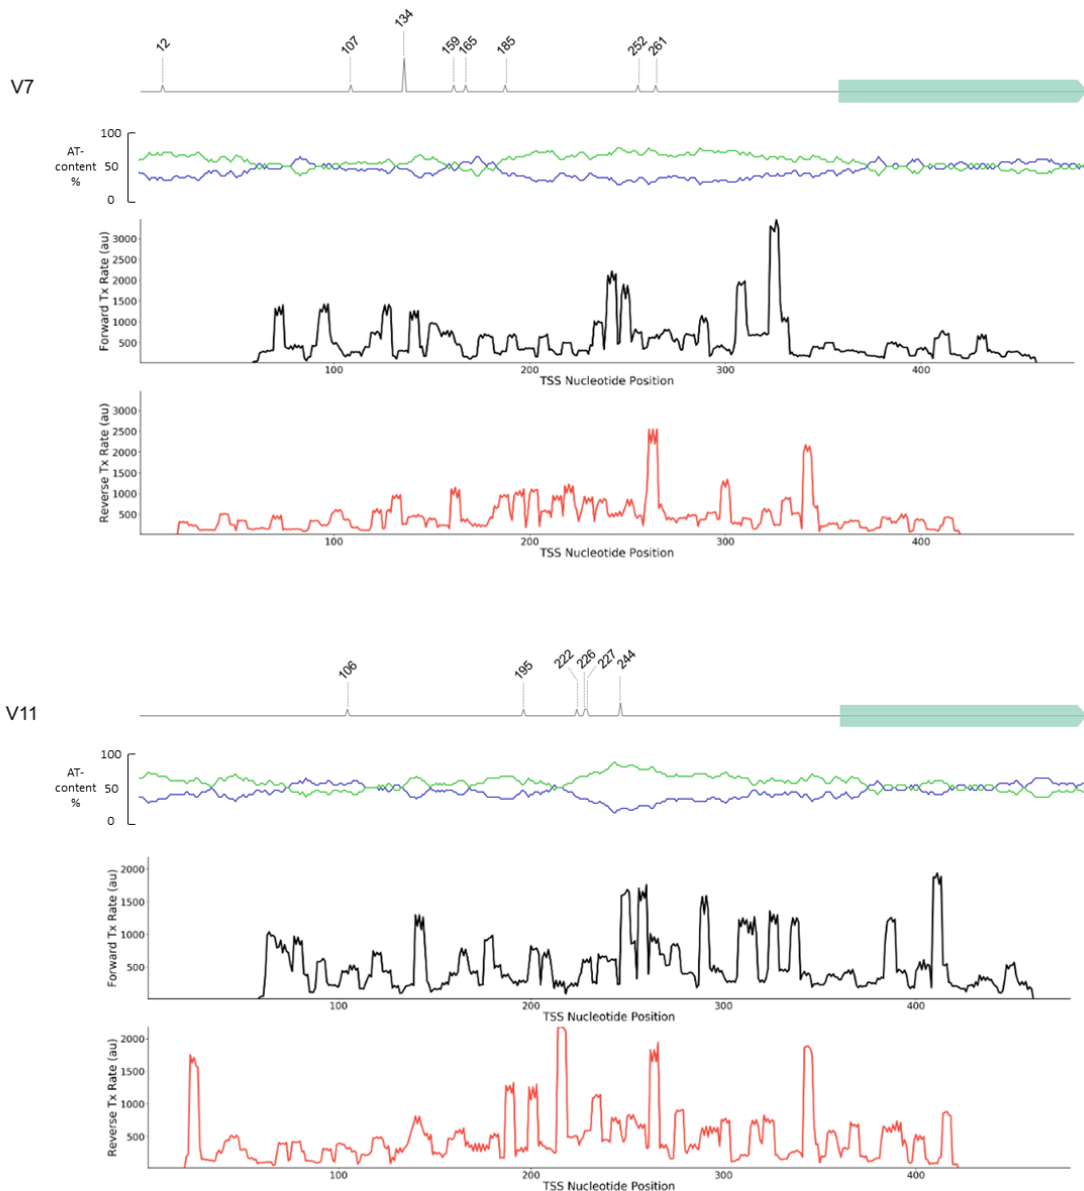

**Supplementary Figure S6. Comparison of detected transcription start sites *in vitro* and *in silico* in gene-less cassettes.** The transcription start sites (TSSs) identified through 5' RACE along the selected cassettes are overlaid with the *in silico* predictions by De Novo DNA software, presented as peaks indicating transcription rates. The experimentally detected TSSs through 5' RACE do not match with those identified by the De Novo DNA software. Graphs illustrating the percentage of AT-content (green curve) and GC-content (blue curve) are also provided for each cassette.

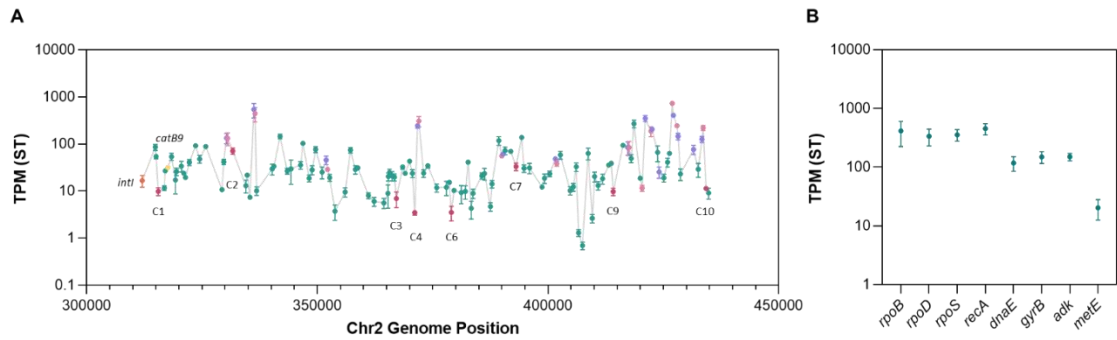

**Supplementary Figure S7. Expression levels of *V. cholerae* N16961 superintegron gene cassettes from BioProject PRJNA420494.** Expression levels represented as transcripts per kilobase million (TPM) of gene cassettes along the superintegron array were calculated from RNA-seq data available in databases in stationary (ST) growth phase (**A**). TPM values of eight housekeeping genes were used as a reference (**B**). TPM values of genes-less cassettes (magenta), toxin-antitoxin systems (mauve and pink), integrase (orange), and the chloramphenicol resistance gene *catB9* (yellow), are highlighted. Error bars represent the standard deviation of three independent biological replicates.

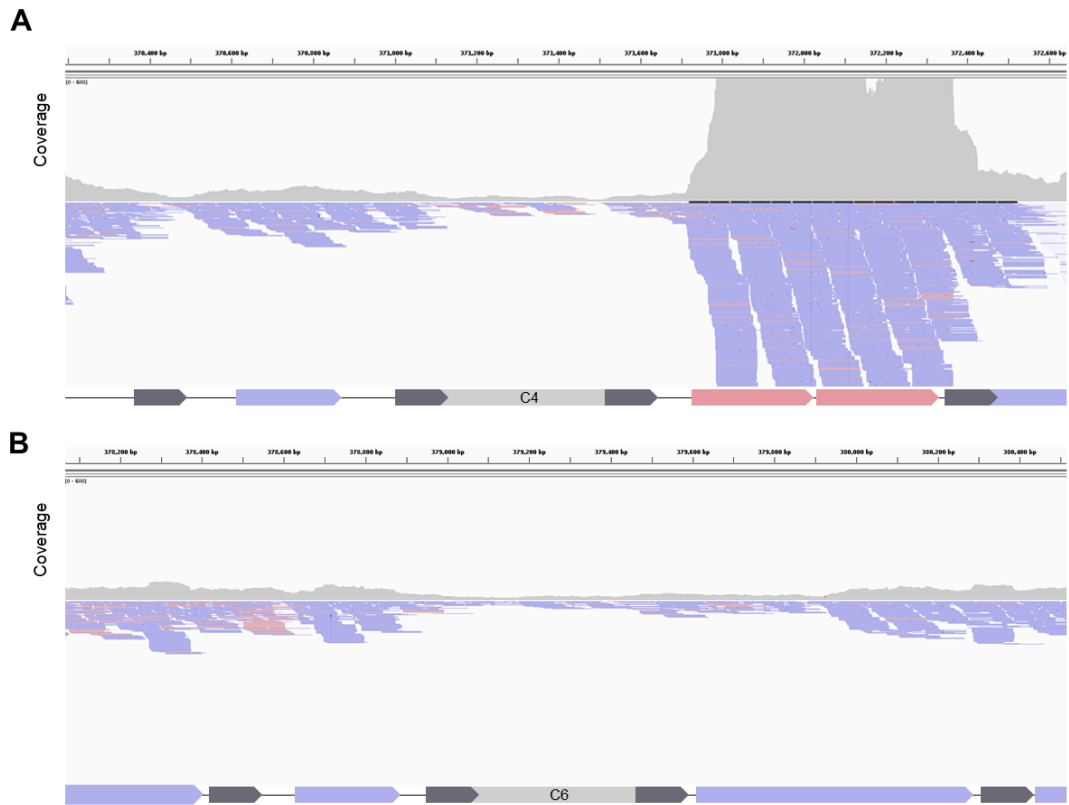

**Supplementary Figure S8. Representation of reads from the RNAseq of *V. cholerae* N16961 superintegron.** The number and orientation of reads, and the coverage upstream and downstream gene-less cassettes C4 (A) and C6 (B) were analyzed by Integrative Genomics Viewer (IGV) software. Blue color designates genes and reads from the plus (sense) strand; red color designates genes and reads from the minus (antisense) strand.
